1 **Title: Integrating patterns of thermal tolerance and phenotypic plasticity with population**  
2 **genetics to improve understanding of vulnerability to warming in a widespread copepod**

3 Running Title: Factors affecting vulnerability to warming

4 **Authors:**

5 Matthew C. Sasaki & Hans G. Dam

6 University of Connecticut, Department of Marine Sciences, Groton, CT, USA

7 Corresponding author: [matthew.sasaki@uconn.edu](mailto:matthew.sasaki@uconn.edu)

8 **Abstract:**

9 Differences in population vulnerability to warming are defined by spatial patterns in thermal  
10 adaptation. These patterns may be driven by natural selection over spatial environmental  
11 gradients, but can also be shaped by gene flow, especially in marine taxa with high dispersal  
12 potential. Understanding and predicting organismal responses to warming requires disentangling  
13 the opposing effects of selection and gene flow. We begin by documenting genetic divergence of  
14 thermal tolerance and developmental phenotypic plasticity. Ten populations of the widespread  
15 copepod *Acartia tonsa* were collected from sites across a large thermal gradient, ranging from  
16 the Florida Keys to Northern New Brunswick, Canada (spanning over 20 degrees latitude).  
17 Thermal performance curves from common garden experiments revealed local adaptation at the  
18 sampling range extremes, with thermal tolerance increasing at low latitudes and decreasing at  
19 high latitudes. The opposite pattern was observed in phenotypic plasticity, which was strongest  
20 at high latitudes. Over a large portion of the sampled range, however, we observed a remarkable  
21 lack of differentiation of thermal performance curves. To examine whether this lack of  
22 divergence is the result of selection for a generalist performance curve or constraint by gene  
23 flow, we analyzed cytochrome oxidase I mtDNA sequences, which revealed abundant genetic

24 diversity and widely-distributed haplotypes. Strong divergence in thermal performance within  
25 genetic clades, however, suggests that the pace of thermal adaptation can be relatively rapid. The  
26 combined insight from the laboratory physiological experiments and genetic data indicate that  
27 gene flow constrains differentiation of thermal performance curves. This balance between gene  
28 flow and selection has implications for patterns of vulnerability to warming. Taking both genetic  
29 differentiation and phenotypic plasticity into account, our results suggest that local adaptation  
30 does not increase vulnerability to warming, and that low latitude populations in general may be  
31 more vulnerable to predicted temperature change over the next century.

32 **Keywords:**

33 Climate change, Climate Variability Hypothesis, Copepod, Gene flow, Local adaptation,  
34 Macrophysiology, Phenotypic plasticity, Plankton, Thermal performance, Rapid adaptation

35 **Introduction:**

36 Temperature affects processes at every level of biological organization (Angilletta, 2009;  
37 Hochachka & Somero, 2002). The rapid warming of the world's oceans (Cheng *et al.*, 2019a;  
38 Cheng *et al.*, 2019b; Roemmich *et al.*, 2015; Saba *et al.*, 2016; Wijffels *et al.*, 2016) presents a  
39 significant threat to contemporary marine biodiversity (Bryndum-Buchholz *et al.*, 2019;  
40 Parmesan, 2006). In addition to the increase in mean ocean temperature, significant increases in  
41 the magnitude and frequency of acute events like heat waves have been predicted (Lorenzo &  
42 Mantua, 2016; Meehl, 2004; Perkins *et al.*, 2012). These acute events have significant  
43 consequences for organisms, and therefore cannot be ignored in predictions of biotic response to  
44 climate change (Campbell-Staton *et al.*, 2017; Leicht *et al.*, 2017; Stoks *et al.*, 2017; Sydeman *et*  
45 *al.*, 2013; Ummenhofer & Meehl, 2017; Wernberg *et al.*, 2016). Vulnerability to these climatic  
46 changes is established by pre-existing spatial patterns in thermal adaptation. Characterizing

47 patterns of thermal adaptation and determining their underlying causes is, therefore, directly  
48 related to our ability to predict vulnerability and responses of the biota to climate change (Moran  
49 *et al.*, 2016; Sorte *et al.*, 2011).

50 Macrophysiology, the study of variation in physiological traits across space and time (Chown *et*  
51 *al.*, 2004), often yields evidence for adaptation across environmental gradients. Latitudinal  
52 thermal gradients, for example, are well-known drivers of local adaptation of thermal tolerance  
53 (Addo-Bediako *et al.*, 2000; Castañeda *et al.*, 2015; Gaitán-Espitia *et al.*, 2017; Pereira *et al.*,  
54 2017; Yampolsky *et al.*, 2013). These patterns in adaptation across large spatial scales are often  
55 attributed to selection acting on a set of populations, as gene flow is assumed to be relatively low  
56 over large distances. This important assumption may not always hold for marine taxa which  
57 often have high dispersal potentials (Bowen *et al.*, 2016; Carlton *et al.*, 2017; Cowen *et al.*, 2006;  
58 Cowen & Sponaugle, 2009; Gélín *et al.*, 2017; Kinlan & Gaines, 2003; Sexton & Norris, 2008).  
59 However, dispersal dynamics in the ocean can be complex (McManus & Woodson, 2012),  
60 preventing easy generalization or prediction of connectivity. Instead, genetic markers are often  
61 required to estimate levels of connectivity between populations (Palumbi, 2003).

62 Adaptive genetic differentiation and phenotypic plasticity are two of the main mechanisms used  
63 by organisms to cope with variation in the thermal environment. (Angilletta, 2009; Dam, 2013;  
64 Magozzi & Calosi, 2014; Somero, 2010; Sparks *et al.*, 2017). Adaptive genetic differentiation is  
65 well-known to produce significant variation in phenotypes (Hochachka & Somero, 2002).  
66 Phenotypic plasticity, the capacity of a single genotype to produce multiple phenotypes in  
67 response to different environmental conditions, can also have large effects (Ayrinhac *et al.*,  
68 2004; Chown *et al.*, 2004, West-Eberhard 2003). Several types of phenotypic plasticity,  
69 including acclimation (Stillman, 2003), hardening (Sørensen *et al.*, 2001), and developmental

70 phenotypic plasticity (Pereira *et al.*, 2017), have all been shown to have strong effects on  
71 organismal thermal tolerance. Both mechanisms are likely to play important roles in determining  
72 organismal responses to climate change (Hoffmann & Sgro, 2011; Reusch, 2013). Importantly,  
73 plasticity acts within generations, and might therefore provide a mechanism for rapid response to  
74 environmental variability (Chevin *et al.*, 2010; Chown *et al.*, 2007; Merilä & Hendry, 2014;  
75 Seebacher & Grigaltchik, 2014). Plasticity may also prevent the loss of cryptic genetic diversity  
76 by shielding genotypes from selection (Friedrich & Meyer, 2016; Pfennig *et al.*, 2010;  
77 Schlichting, 2004). This is in stark contrast to selection on standing genetic diversity, which may  
78 result in strong demographic bottlenecks and the loss of genetic diversity (Corbett-Detig *et al.*,  
79 2015; Hoffmann & Sgrò, 2011; Kellermann *et al.*, 2009). Studies that examine both mechanisms  
80 across large spatial scales are needed.

81 Characterizing the spatial patterning of phenotypic plasticity and adaptive genetic differentiation  
82 is important for predictions of population vulnerability to warming. The Climate Variability  
83 Hypothesis (CVH) (Janzen, 1967; Stevens, 1989) posits that thermal tolerance should correspond  
84 to the mean temperature experienced by a population whereas phenotypic plasticity should  
85 evolve in response to variability in the thermal environment. This hypothesis has accumulated  
86 support over time, especially in terrestrial and freshwater systems (Deutsch *et al.*, 2008; Sunday  
87 *et al.*, 2010), but still lacks robust experimental validation in the marine realm. It has also been  
88 proposed that patterns in the evolution of phenotypic plasticity may be the result of a trade-off  
89 between thermal tolerance and the strength of phenotypic plasticity (Stillman, 2003), where  
90 higher thermal tolerance evolves at the expense of the capability to modify the phenotype via  
91 plasticity.

92 Patterns in adaptation can, however, also be strongly influenced by gene flow (Lenormand,  
93 2002). The “Gene Flow vs. Selection” issue has been at the heart of evolutionary ecology for  
94 decades (Blanquert *et al.* 2013; Slatkin, 1985; 1987). Successful gene flow between populations  
95 can strongly impede local adaptation (Garant *et al.*, 2007; Hendry & Taylor, 2004; Lenormand,  
96 2002; Moore *et al.*, 2007; Nosil & Crespi, 2004), and phenotypic divergence is often correlated  
97 with the degree of isolation (Mayr, 1963). However, low levels of gene flow might also promote  
98 local adaptation by increasing the genetic diversity contained within a population (Garant *et al.*,  
99 2007; Tallmon *et al.*, 2004). The potential for interaction between selection and gene flow makes  
100 integrated approaches to studying evolutionary physiology critical for robust characterization of  
101 spatial patterns in adaptation. Taking both selection and gene flow into account may be needed to  
102 explain observed patterns of adaptation (Dionne *et al.*, 2008; Moore & Hendry 2005).

103 Spatial patterns in both adaptation and predicted warming interact to produce what is likely to be  
104 spatially heterogeneous vulnerability to warming. Understanding which populations are more  
105 vulnerable to warming, and why, is critical for effective management and conservation of  
106 diversity. Previous work has suggested that warm-adapted, low latitude species or populations  
107 are more vulnerable to climate change as they already experiencing temperatures near their  
108 thermal maxima (Comte & Olden, 2017; Tewksbury *et al.*, 2008; Vinagre *et al.*, 2016).

109 However, this is not a universal observation, and populations from mid- to high-latitudes have  
110 also been predicted to be more vulnerable (Bennett *et al.*, 2015; Calosi *et al.*, 2008; Fusi *et al.*,  
111 2015). Additionally, these predictions are often based on measurements of thermal tolerance.

112 This is insufficient, however, as phenotypic plasticity may also play a large role in determining  
113 vulnerability to climate change (Burggren, 2018; Chown *et al.*, 2007; Magozzi & Calosi, 2015;  
114 Sparks *et al.*, 2017). Examining spatial patterns in both thermal tolerance and the strength of  
115 phenotypic plasticity may provide more robust estimates of vulnerability.

116 Copepods are the most abundant metazoans in the ocean (Humes, 1994; Turner, 2004). They  
117 play an important role in transferring energy from primary producers to secondary consumers  
118 and are therefore tightly linked to global biogeochemical systems (Menden-Deuer & Kiørboe,  
119 2016), marine trophic webs (Turner, 2004), and commercial fisheries (Castonguay *et al.*, 2008;  
120 Dam and Baumann, 2017; Friedland *et al.*, 2012). Studies of thermal adaptation in copepods  
121 have a long history (Bradley, 1978; Lonsdale & Levinton, 1985), but local adaptation has largely  
122 been ignored, especially in pelagic species (but see Smolina *et al.*, 2016). The calanoid copepod  
123 *Acartia tonsa* often dominates coastal and estuarine environments. With a large latitudinal  
124 distribution (Turner, 1981) and a life-history amenable to laboratory culturing, this is an ideal  
125 model species for studying spatial patterns in adaptation. Previous studies of *Acartia* species  
126 have observed local adaptation to several different factors, including exposure to toxic  
127 dinoflagellates (Colin & Dam, 2002; 2004), salinity (Plough *et al.*, 2018), and pH (Aguilera *et*  
128 *al.*, 2016). Limited evidence also exists that local adaptation to temperature occurs across large  
129 geographic scales (González, 1974; Sasaki *et al.*, 2019). This past work suggests that low latitude  
130 populations may be more vulnerable to warming (Sasaki *et al.*, 2019), but conclusions are  
131 limited by the lack of spatial coverage and the number of populations used. Additionally, no  
132 population genetic information was included. Population genetic studies have shown genetic  
133 structuring in this taxon to be complex, with abundant cryptic diversity (Caudill & Bucklin,  
134 2004; Chen & Hare, 2011). The effects of this genetic diversity on patterns of adaptation has  
135 largely been ignored (but see Plough *et al.* 2018). Here we examine both large- and fine-scale  
136 spatial patterns in the effects of genetic differentiation and phenotypic plasticity on the thermal  
137 performance curves (TPCs) of *Acartia tonsa*. We observe clear latitudinal variation in both  
138 thermal tolerance and the magnitude of the plastic response, but also find a remarkable lack of  
139 divergence over a large portion of the sampled range. Paired with insights from the analysis of

140 cytochrome oxidase I (COI) mtDNA sequence data, we suggest that this lack of divergence is  
141 due to constraint by gene flow rather than selection for a generalist performance curve. These  
142 spatial patterns in adaptation will likely affect vulnerability to warming, with southern  
143 populations being the most vulnerable.

## 144 **Methods:**

### 145 Sampling and Culture Maintenance

146 Copepods were collected from ten sites spanning 21 degrees of latitude, ranging from the Florida  
147 Keys to the Northumberland Strait in Canada (Fig. 1; Table 1). Sites selected cover a range of  
148 thermal environments, with mean monthly temperatures ranging from 9.05 – 25.1°C, and average  
149 monthly temperature ranges varying between 1.38 – 12.88°C. At each site, samples were  
150 collected in surface plankton tows using a 250- $\mu$ m mesh plankton net with a solid cod end. Water  
151 column depth was less than 10 m at all sites. Salinity and surface water temperature were  
152 recorded at the time of collection. Within 3 hours of collection, mature *Acartia tonsa* individuals  
153 were visually identified using a dissection microscope and sorted into 0.6- $\mu$ m filtered sea water  
154 (FSW), with salinity and temperature adjusted to match collection conditions. Each culture began  
155 with more than 1000 mature females and abundant males to ensure fertilization. Additional  
156 individuals were preserved in 95% molecular grade ethanol for later genetic analysis. All  
157 samples and cultures were then transported by car back to the University of Connecticut, Avery  
158 Point campus. Copepods were transported in temperature-controlled containers with particular  
159 care to maintain temperature and salinity near collection conditions. Aquarium bubblers were  
160 used to keep containers well oxygenated. Copepods were fed with a mixture of a green flagellate  
161 (*Tetraselmis* sp.) and a small diatom (*Thalassiosira weissflogii*) during transport. In the  
162 laboratory, live cultures were gradually brought to 18°C and 30 practical salinity units (psu) and

163 then maintained for several generations under constant conditions to minimize the effects of  
164 previous environmental acclimation. Aquarium bubblers were used to ensure cultures were well  
165 oxygenated. The water of each culture was changed weekly. During this period, cultures were  
166 fed *ad libitum* a mixture of a green flagellate (*Tetraselmis* sp.), a small diatom (*Thalassiosira*  
167 *weissflogii*), and a cryptomonad (*Rhodomonas salina*). Phytoplankton were cultured semi-  
168 continuously in F/2 medium (without silica for *Tetraselmis* and *Rhodomonas*) with a 12 hr:12 hr  
169 light:dark cycle at 18°C. Genetic samples were kept at -80°C until extraction.

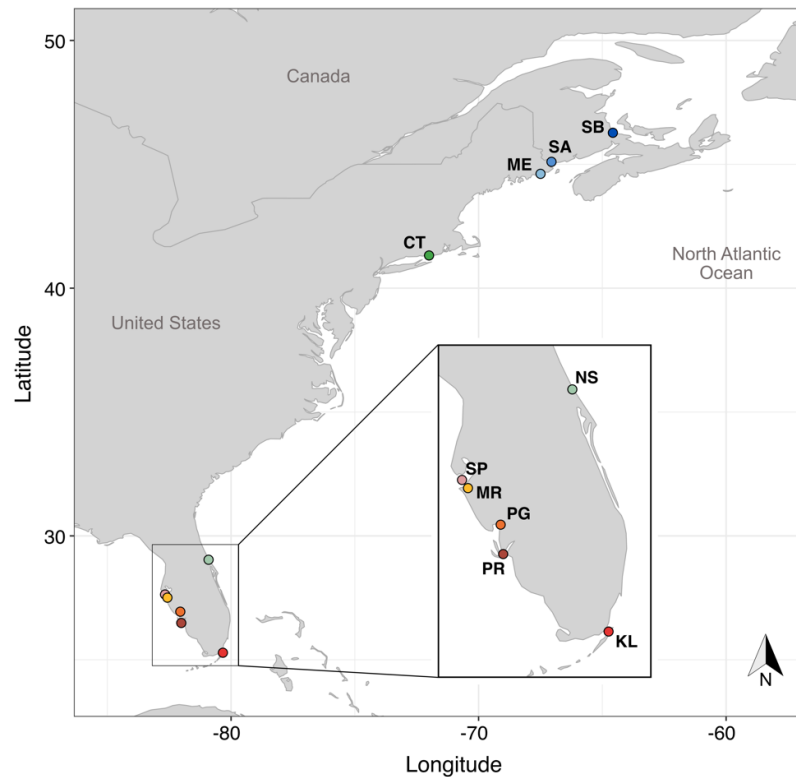

170

171 Figure 1: Map of sampling locations in the North Atlantic and Gulf of Mexico. The inset is a  
172 closer view of the southern sampling sites, to better show the spatial arrangement. Sampled site  
173 names are abbreviated: Shediac Bay (SB), St. Andrew (SA), Maine (ME), Connecticut (CT),  
174 New Smyrna (NS), St. Petersburg (SP), Manatee River (MR), Punta Gorda (PG), Punta Rasa  
175 (PR), and Key Largo (KL). Additional site details can be found in Table 1.



176 Table 1: Collection site details for each of the ten populations recovered. Site names are  
 177 provided, along with the two-letter abbreviation used. Water body refers to the general area  
 178 where each site is located. The latitude of each site is provided, along with the salinity of  
 179 collection. High salinity refers to sites with a salinity greater than 28 psu, while the low salinity  
 180 sites both had a salinity of 5 psu. Climatological temperature data for each of the sites are also  
 181 included. Raw temperature data was acquired from the MODIS-aqua sea surface temperature  
 182 database and summarized to monthly intervals using CDO (Schulzweida *et al.*, 2009).

| <b>Population</b> | <b>Abbr.</b> | <b>Water Body</b>     | <b>Latitude</b> | <b>Salinity</b> | <b>Monthly Mean<br/>Temp. (°C)</b> | <b>Monthly Maximum<br/>Temp. (°C)</b> | <b>Monthly Minimum<br/>Temp. (°C)</b> | <b>Monthly Temperature<br/>Range (°C)</b> | <b>Monthly Temperature<br/>Variance (°C)</b> |
|-------------------|--------------|-----------------------|-----------------|-----------------|------------------------------------|---------------------------------------|---------------------------------------|-------------------------------------------|----------------------------------------------|
| Key Largo         | KL           | Florida - Atlantic    | 25.2838         | High            | 25.10                              | 29.56                                 | 23.73                                 | 2.87                                      | 1.91                                         |
| Punta Rasa        | PR           | Florida - Gulf Coast  | 26.4835         | High            | 24.79                              | 29.42                                 | 19.35                                 | 10.47                                     | 8.17                                         |
| Punta Gorda       | PG           | Florida - Gulf Coast  | 26.9403         | Low             | 24.69                              | 28.80                                 | 20.04                                 | 9.05                                      | 7.06                                         |
| Manatee River     | MR           | Florida - Gulf Coast  | 27.5056         | Low             | 20.77                              | 21.84                                 | 19.87                                 | 1.99                                      | 1.79                                         |
| St. Petersburg    | SP           | Florida - Gulf Coast  | 27.5073         | High            | 24.02                              | 29.50                                 | 17.66                                 | 1.38                                      | 9.59                                         |
| New Smyrna        | NS           | Florida - Atlantic    | 29.0374         | High            | 22.84                              | 26.71                                 | 18.60                                 | 8.45                                      | 6.35                                         |
| Connecticut       | CT           | Long Island Sound     | 41.3205         | High            | 12.52                              | 18.69                                 | 6.55                                  | 12.88                                     | 17.41                                        |
| Machias           | MA           | Gulf of Maine         | 44.6150         | High            | 9.05                               | 11.87                                 | 6.41                                  | 5.81                                      | 5.77                                         |
| St. Andrew        | SA           | Bay of Fundy          | 45.1000         | High            | 9.37                               | 13.06                                 | 5.75                                  | 7.72                                      | 9.81                                         |
| Shediac Bay       | SB           | Northumberland Strait | 46.272          | High            | 12.38                              | 15.76                                 | 8.31                                  | 12.06                                     | 19.66                                        |

183

## 184 Heat Stresses and Performance Curve Estimation

185 After two generations, a split-brood common garden experiment was used to examine the effects  
186 of genetic differentiation and developmental phenotypic plasticity on the thermal performance  
187 curve (TPC) of *Acartia tonsa*. For each population, eggs were collected and randomly split  
188 between two developmental temperatures, 18°C and 22°C. All other conditions were kept the  
189 same between treatments. Upon reaching maturity, females were collected from both  
190 developmental conditions and exposed to a 24-hour acute heat stress. Healthy individuals were  
191 placed into 1.5 mL of FSW in a 2.0 mL microfuge tube, which was then partially capped to  
192 allow for gas exchange with the atmosphere. Only one female was placed into each tube. After  
193 all tubes were filled, they were left to rest for one hour at their respective developmental  
194 temperatures. Tubes were then placed into dry baths and exposed to a single temperature,  
195 ranging from 18°C to 38°C. The number of females per temperature varied, with fewer  
196 individuals exposed to the lowest and highest temperatures (where survivorship was expected to  
197 be least variable) and more individuals at intermediate temperatures. At least six females were  
198 used per temperature. Each female experienced only one temperature throughout the duration of  
199 the assay and was used for only one assay. After 24 hours, tubes were collected, and survivorship  
200 was determined visually using a dissection scope. Copepods were marked as alive if there was an  
201 active response to external stimuli or visible gut passage movement. Evaporation (and therefore  
202 fluctuations in salinity) was negligible during the heat stress.

203 All statistical analyses were performed using the software package R (R Core Team, 2016).  
204 Logistic regressions were used to estimate TPCs for the two developmental treatments for all ten  
205 populations. A three-way ANOVA was used to examine the effects of genetic differentiation and  
206 phenotypic plasticity on the TPCs (survival as a function of stress temperature, population, and

207 developmental temperature). An effect of genetic differentiation would be indicated by a  
208 significant population term, while an effect of developmental phenotypic plasticity would be  
209 indicated by a significant developmental temperature term. Population differences in the strength  
210 of phenotypic plasticity would be indicated by a significant population x developmental  
211 temperature term (a heterogeneity of slopes test).

212 Each curve was also summarized by estimation of LD<sub>50</sub> values (the temperature at which 50%  
213 survivorship would be observed). This is a common metric for thermal tolerance. We define the  
214 difference in LD<sub>50</sub> values between the two developmental treatments ( $\Delta$ LD<sub>50</sub>) as the strength of  
215 developmental phenotypic plasticity. Standard error for  $\Delta$ LD<sub>50</sub> values were calculated as  
216  $\sqrt{(SE_{18C}^2 + SE_{22C}^2)}$ , where SE<sub>18C</sub> and SE<sub>22C</sub> are the standard error estimates for LD<sub>50</sub> from the  
217 18°C and 22°C developmental temperature groups, respectively. The effect of plasticity was also  
218 estimated by calculating the average increase at all survivorship levels from 10% - 90%, which  
219 we call  $\Delta$ LD<sub>average</sub>. This takes into account any potential population-specific non-linearities in the  
220 effect of phenotypic plasticity across the TPC. We also estimated LD<sub>10</sub> (temperature of 10%  
221 survival) and  $\Delta$ LD<sub>10</sub> values as estimates of thermal limits.

## 222 Climatologies and Correlations

223 Daily satellite sea-surface temperature (SST) measurements for the years 2000 - 2017 were  
224 retrieved for each geographic location from the MODIS-Aqua database  
225 (<https://oceancolor.gsfc.nasa.gov/data/aqua/>). Because *A. tonsa* has generation times on the order  
226 of weeks to a month, this data was summarized as average monthly climatological parameters  
227 (mean, maximum, and minimum temperatures as well as temperature range and variance; Table  
228 1) using the command line Climate Data Operators (CDO; Schulzweida *et al.*, 2009).

229 The CVH postulates that thermal tolerance ( $LD_{50}$ ) should respond to some mean representation  
230 of the thermal environment, while the strength of the phenotypic plasticity ( $\Delta LD_{50}$ ) should reflect  
231 the variation in the thermal environment. To test these predictions, we regressed our metrics of  
232 thermal adaptation against the environmental parameters of interest ( $LD_{50} \sim$  developmental  
233 temperature + monthly mean + monthly maximum + monthly minimum;  $\Delta LD_{50} \sim$  monthly  
234 temperature variance + monthly temperature range). A linear regression was also used to  
235 examine the relationship between thermal tolerance and the strength of plasticity. Trade-offs  
236 between thermal tolerance and the strength of phenotypic plastic (Stillman, 2003) would be  
237 suggested by a significant negative relationship between  $LD_{50}$  and  $\Delta LD_{50}$ . Correlations between  
238 the environmental parameters and latitude, as well as with each other were also examined.

### 239 Vulnerability to Warming

240 The statistical model used to estimate TPCs from the common garden experiment can also be  
241 used to predict what would happen if parameters like developmental temperature and stress  
242 temperature change. We use this to estimate vulnerability to warming across the ten populations  
243 examined. For each population, we estimated the TPC with the mean monthly temperature as the  
244 developmental temperature, using the *predict.glm* function in R (*stats* package). Survivorship at  
245 the mean monthly maximum temperature was then taken from this modelled TPC. The  
246 magnitude of predicted warming at each site over the next century was visually estimated from a  
247 high resolution model of warming in the North Atlantic (Saba *et al.* 2016). Future survivorship  
248 was estimated in a similar manner using these future temperature values (Supp. Table 1).  
249 Vulnerability was estimated as the difference between current and future survivorship values; a  
250 positive difference indicates an increase in survivorship (less vulnerable to warming) while a  
251 negative value indicates a decrease in survivorship (more vulnerable to warming).

## 252 DNA Extraction, Amplification, and Sequencing

253 Mitochondrial cytochrome-oxidase I (COI) sequence data was generated for individuals from all  
254 ten populations (n = 17 - 34 per population). DNA was extracted using a Qiagen Blood and  
255 Tissue kit following the manufacturer's instructions. Extracted DNA was eluted in 50  $\mu$ l of  
256 elution buffer (25  $\mu$ l twice) and stored at -20°C. COI sequences were amplified by polymerase  
257 chain reaction (PCR) using mtCOI primers LCO1490 (forward:  
258 GGTCAACAAATCATAAAGATATTGG) and HCO2198 (reverse:  
259 TAAACTTCAGGGTGACCAAAAATCA) (Folmer *et al.*, 1994). All PCR reactions were  
260 performed in 24  $\mu$ l volumes with 13  $\mu$ l ExTaq HS polymerase (Takara Bio Inc.), 1  $\mu$ l each  
261 forward and reverse primers, 5  $\mu$ l genomic DNA, and 5  $\mu$ l ultrapure molecular grade water. The  
262 optimized PCR protocol began with an initial denaturation of 94°C for 3 minutes followed by 35  
263 cycles of denaturation at 94°C for 45 seconds, annealing at 48°C for 45 seconds, and extension at  
264 72°C for 45 seconds. The protocol ended with a final extension at 72°C for 7 minutes.  
265 Amplification success and product length were confirmed visually using a 1.2% agarose gel  
266 post-stained with GelRed (Biotium Inc.). Successful amplification products were then purified  
267 using an ExoSAP-IT PCR clean-up kit (ThermoFisher Scientific) following manufacturer's  
268 instructions before being sent to Eurofins Genomics for forward and reverse strand sequencing.

## 269 Sequence Analysis

270 Consensus sequences were generated for each individual using forward and reverse strands in  
271 UniPro (Okonechnikov *et al.*, 2012). Sequences were aligned using Clustal-W (Thompson *et al.*,  
272 1994) and then visually checked. Species identity of each sequence was verified by BLAST  
273 search in NCBI's GenBank database (Sayers *et al.*, 2018). Population genetic summary statistics  
274 (nucleotide diversity ( $\pi$ ), haplotype diversity (Hd), and average number of nucleotide differences

275 between haplotypes) were calculated using DNaSP v6 (Librado & Rozas, 2009). A haplotype  
276 network using an infinite site model was computed using the R package *Pegas* (Paradis, 2010).  
277 MigrateN was used to estimate mutation-scaled population size and migration rate values  
278 (Beerli, 2006; Beerli & Felsenstein, 2001). The transition-transversion ratio was set to 20. A  
279 uniform migration rate prior was set with a minimum of 0 and a maximum of 2000, while the  
280 population size prior was set with a minimum of 0.001 and a maximum of 0.1. Analyses entailed  
281 a single long MCMC chain with 4 concurrent replicates and a static heating scheme. 10,000,000  
282 steps were recorded with a burn-in of 500,000. All other settings used default values. The  
283 number of migrants per generation ( $N_M$ ) was then calculated as  $N_{M(\text{pop1} \rightarrow \text{pop2})} = \Theta_{\text{pop1}} * M_{\text{pop1} \rightarrow \text{pop2}}$ .  
284 A linear regression between the number of migrants per generation and the pairwise  
285 population difference in  $LD_{50}$  was used to investigate constraint of thermal adaptation by gene  
286 flow.

## 287 **Results:**

### 288 Differentiation of Thermal Performance Curves

289 A total of 6144 females were used to estimate the thermal performance curves (Fig. 2). The  
290 ANOVA results for the TPCs yield a significant effect of both population and developmental  
291 temperature (both  $p < 2.2 \times 10^{-16}$ ; Table 2), indicating an influence of both genetic differentiation  
292 and developmental phenotypic plasticity, respectively. The significant interaction term between  
293 stress temperature and population ( $p < 2.2 \times 10^{-16}$ ) indicates that genetic differentiation results in  
294 changes to the shape of the performance curve, while the significant interaction term between  
295 population and developmental temperature ( $p = 1.45 \times 10^{-7}$ ) indicates that the strength of  
296 phenotypic plasticity differs between populations.

297 Table 2: Results of an ANOVA on the logistic regression of survivorship against stress  
298 temperature, population, and developmental temperature. All terms are statistically significant (*p*  
299 values  $\ll 0.0002$ )

|                              | <b>Df</b> | <b>Deviance</b> | <b>Resid. Df</b> | <b>Resid. Dev</b> | <b>Pr(&gt;Chi)</b> |
|------------------------------|-----------|-----------------|------------------|-------------------|--------------------|
| Stress Temp                  | 1         | 3024.26         | 6140             | 5158.1            | < 2.2e-16          |
| Population                   | 9         | 351.38          | 6131             | 4806.8            | < 2.2e-16          |
| Dev Temp                     | 1         | 266.91          | 6130             | 4539.8            | < 2.2e-16          |
| Stress Temp * Pop            | 9         | 102.14          | 6121             | 4437.7            | < 2.2e-16          |
| Stress Temp * Dev Temp       | 1         | 23.95           | 6120             | 4413.8            | 9.90E-07           |
| Pop * Dev Temp               | 9         | 49.31           | 6111             | 4364.4            | 1.45E-07           |
| Stress Temp * Pop * Dev Temp | 9         | 32.45           | 6102             | 4332              | 0.0001665          |

300

301 These results are clearly evident in the TPCs (Fig. 2). Shediac Bay, the northernmost population,  
302 has a TPC shifted towards cooler temperatures while the southernmost population, Key Largo,  
303 has a TPC shifted towards warmer temperatures. Two groups of intermediate TPCs are also  
304 observed, one containing the populations from Manatee River, Punta Gorda, and Punta Rasa,  
305 with the other comprised of all remaining populations. This pattern can also be seen in the LD<sub>50</sub>  
306 values of the 18°C developmental temperature group (Fig. 3). Differences are reduced in the  
307 22°C developmental temperature group.

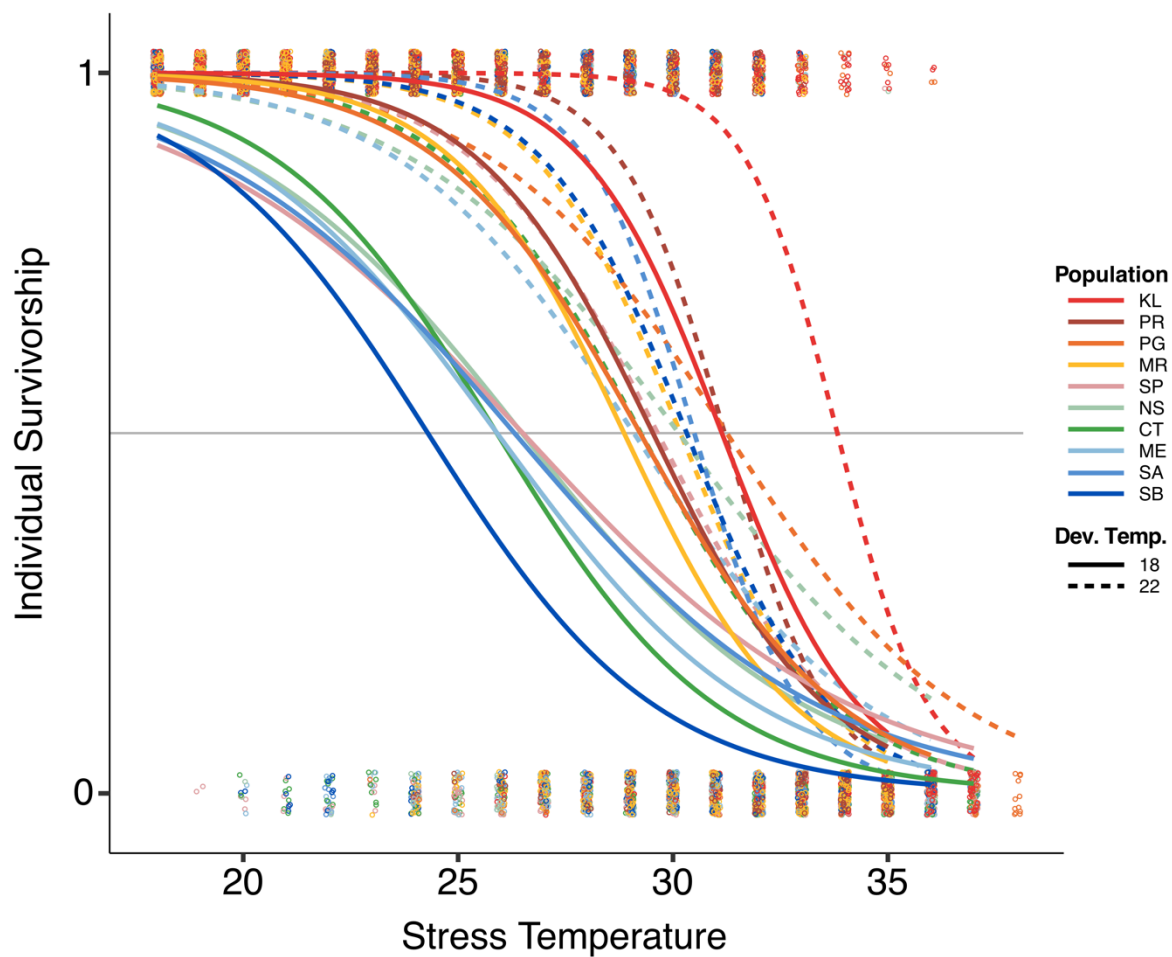

308

309 Figure 2: Thermal survivorship curves for each of the ten populations (different colors) and  
310 developmental temperatures (solid vs. dashed lines). Survivorship was measured using  
311 individuals from a split-brood, common garden experiment and a 24-hour acute heat shock.  
312 Survivorship was recorded as binary data (1 = survived, 0 = died), with curves estimated by  
313 logistic regression.



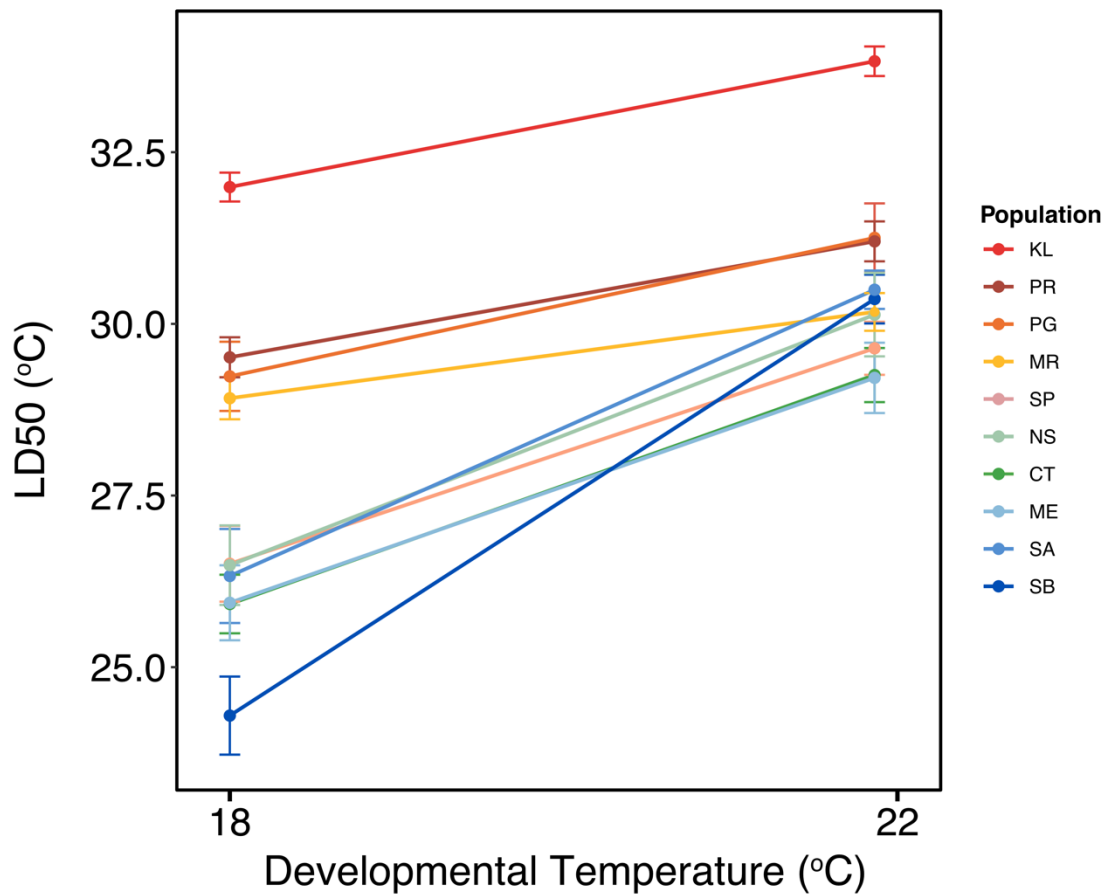

314

315 Figure 3: Reaction norms of thermal tolerance ( $LD_{50}$ ) for the ten populations, shown in different  
316 colors.  $LD_{50}$  was calculated as the temperature at which 50% survivorship was observed in the  
317 thermal performance curve. Error bars show standard errors. The slope of the individual norms  
318 represents the strength of developmental phenotypic plasticity ( $\Delta LD_{50}$ ).

319 Thermal tolerance increased with warmer developmental temperature in all populations,  
320 suggesting a ubiquitous effect of developmental phenotypic plasticity. Shediac Bay, the  
321 northernmost population had the largest strength of phenotypic plasticity while Manatee River, a  
322 population from the Gulf Coast of Florida, had the smallest. The various crossed reaction norms  
323 also indicate variation in the strength of plasticity. The effects of developmental phenotypic

324 plasticity were stronger for thermal tolerance than thermal limits ( $\Delta LD_{50} > \Delta LD_{10}$ ; Supp. Fig. 1).  
325 There are no large differences between  $\Delta LD_{50}$  and  $\Delta LD_{\text{average}}$  (Supp. Fig. 2), so we will focus  
326 only on  $\Delta LD_{50}$  for the sake of uniformity with the  $LD_{50}$  metric of thermal tolerance.

### 327 Lack of Differentiation in Thermal Performance Curves

328 Interestingly, we also observed a striking lack of differentiation in the TPCs of populations from  
329 a large portion of the sampling range, indicated by the boxes in Fig. 4. Thermal tolerance values  
330 for the St. Petersburg (SP), New Smyrna (NS), Connecticut (CT), Maine (ME), and Saint  
331 Andrew (SA) populations, spanning over 20 degrees latitude and originating from drastically  
332 different thermal environments, were remarkably similar. This lack of differentiation is also seen  
333 in the strength of developmental phenotypic plasticity.

### 334 Environmental Correlations

335 Despite the lack of differentiation between some populations,  $LD_{50}$  and  $\Delta LD_{50}$  were both  
336 significantly correlated with latitude ( $p = 0.0017$  and  $0.008$  respectively; Table 3; Fig. 4).  
337 ANOVA results show  $LD_{50}$  to be significantly correlated with both mean monthly temperature ( $p$   
338  $= 3.7 \times 10^{-4}$ ) and mean monthly minimum temperature ( $p = 0.0012$ ; Table 4; Fig. 5).  $\Delta LD_{50}$  is  
339 significantly correlated with mean monthly temperature variance ( $p = 0.015$ ) but not mean  
340 monthly temperature range ( $p = 0.58$ ; Table 4; Fig. 5). Both mean monthly temperature and mean  
341 monthly temperature variance were significantly correlated with latitude ( $p = 1.81 \times 10^{-6}$  and  
342  $0.045$  respectively; Supp. Fig. 3, 4) but not with each other ( $p = 0.14$ ; Supp. Fig. 5). There is a  
343 significant correlation between  $LD_{50}$  and  $\Delta LD_{50}$  ( $p = 0.0023$ ; Fig. 6).

344 Table 3: ANOVA results for the correlation between thermal tolerance and the strength of  
 345 phenotypic plasticity with latitude.

|                         | Df | Sum Sq  | Mean Sq | F value | Pr(>F)    |
|-------------------------|----|---------|---------|---------|-----------|
| <b>LD<sub>50</sub></b>  |    |         |         |         |           |
| Dev. Temp.              | 1  | 45.923  | 45.923  | 23.3632 | 0.0001834 |
| Latitude                | 1  | 27.812  | 27.812  | 14.1493 | 0.0017056 |
| Dev. Temp. x Latitude   | 1  | 5.4     | 5.4     | 2.7474  | 0.1168863 |
| Residuals               | 16 | 31.45   | 1.966   |         |           |
| <b>ΔLD<sub>50</sub></b> |    |         |         |         |           |
| Latitude                | 1  | 11.1685 | 11.1685 | 12.196  | 0.008171  |
| Residuals               | 8  | 7.3261  | 0.9158  |         |           |

346

347 Table 4: ANOVA results for the correlation between thermal tolerance and the strength of  
 348 phenotypic plasticity with environmental parameters.

|                         | Df | Sum Sq  | Mean Sq | F value | Pr(>F)    |
|-------------------------|----|---------|---------|---------|-----------|
| <b>LD<sub>50</sub></b>  |    |         |         |         |           |
| Dev. Temp.              | 1  | 45.923  | 45.923  | 37.1471 | 2.05E-05  |
| Monthly Mean            | 1  | 25.722  | 25.722  | 20.8062 | 0.0003746 |
| Monthly Maximum         | 1  | 0.693   | 0.693   | 0.5603  | 0.4657218 |
| Monthly Minimum         | 1  | 19.704  | 19.704  | 15.9388 | 0.0011775 |
| Residuals               | 15 | 18.544  | 1.236   |         |           |
| <b>ΔLD<sub>50</sub></b> |    |         |         |         |           |
| Monthly Variance        | 1  | 10.8028 | 10.8028 | 10.3074 | 0.01485   |
| Monthly Range           | 1  | 0.3555  | 0.3555  | 0.3392  | 0.57859   |
| Residuals               | 7  | 7.3364  | 1.0481  |         |           |

349

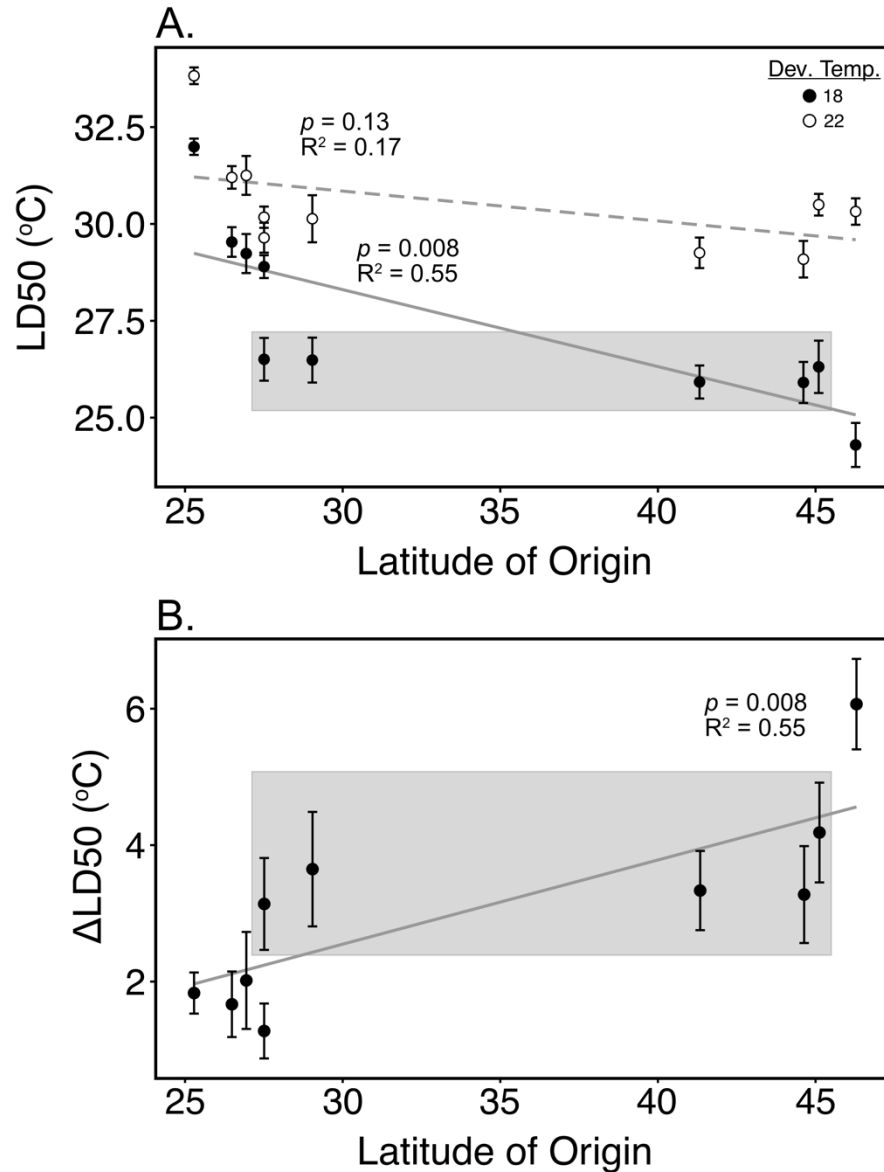

350

351 Figure 4: Latitudinal patterns in thermal adaptation. A) Thermal tolerance (LD<sub>50</sub>) is plotted  
352 against latitude of origin. Filled circles represent thermal tolerance values from the 18°C  
353 developmental temperature while unfilled circles are values from the 22°C developmental  
354 temperature. B) Developmental phenotypic plasticity (ΔLD<sub>50</sub>) is plotted against latitude of  
355 origin. In both panels, error bars represent standard error. Boxes highlight the latitudinal region  
356 with limited divergence of thermal performance curves.

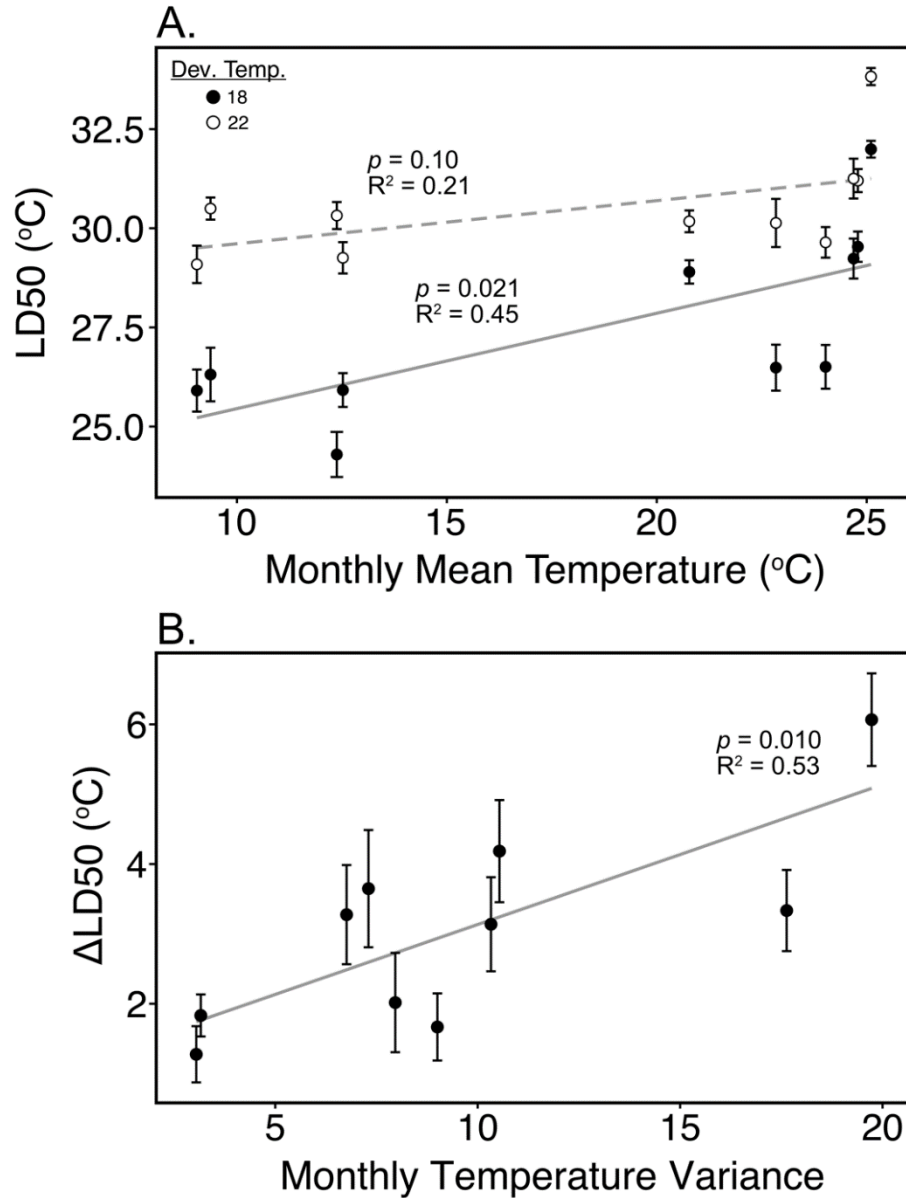

357

358 Figure 5: Correlation between thermal performance metrics and environmental parameters, as  
359 predicted by the Climate Variability Hypothesis. A) Thermal tolerance ( $LD_{50}$ ) is correlated with  
360 mean monthly temperature. Filled circles represent thermal tolerance values from the 18°C  
361 developmental temperature while empty circles are values from the 22°C developmental  
362 temperature. B) Phenotypic plasticity ( $\Delta LD_{50}$ ) is correlated with mean monthly temperature  
363 variance. In both panels, error bars represent standard error.

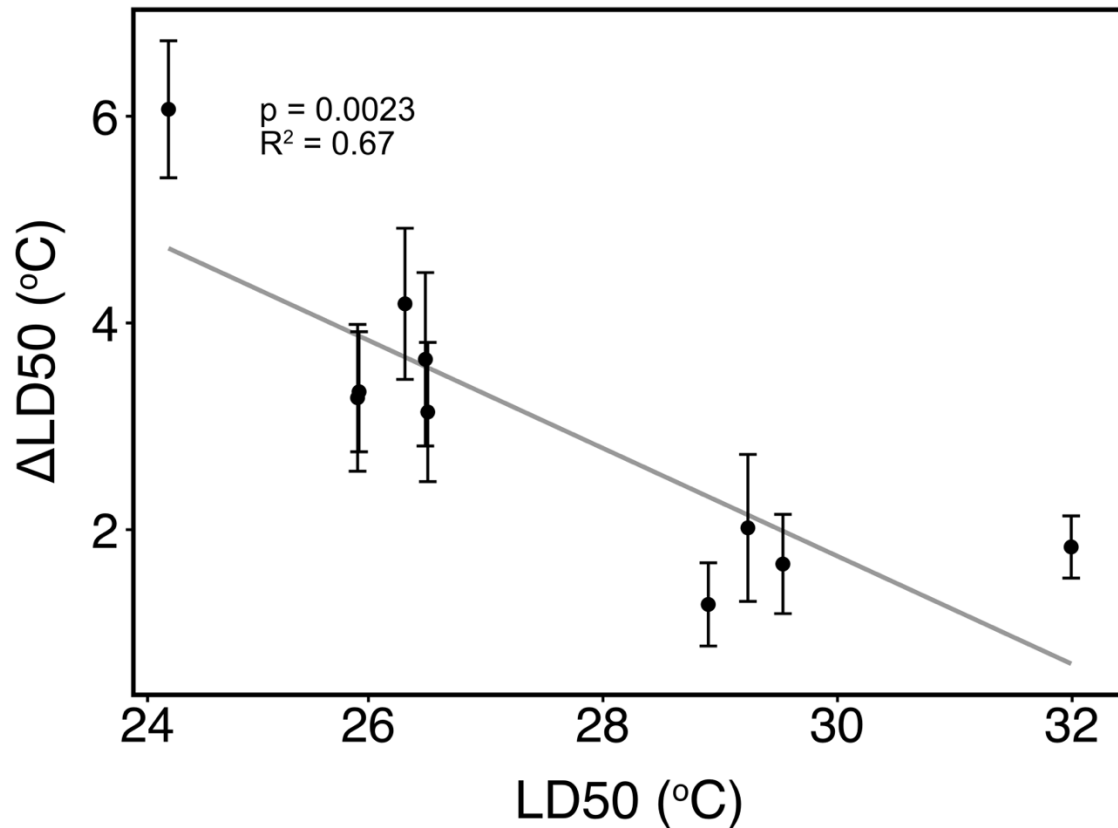

364

365 Figure 6: Linear correlation between thermal tolerance ( $LD_{50}$ ) and the strength of developmental  
366 phenotypic plasticity ( $\Delta LD_{50}$ ) for the ten populations. Error bars represent standard error.

367 Vulnerability to Warming

368 Change in survivorship at mean monthly maximum temperatures ranged from -16% to +9.8%  
369 (Supp. Table 1). There was a general trend in vulnerability across latitudes (Fig. 7). Locally  
370 adapted populations from low latitudes either saw almost no change (KL and MR) or a reduction  
371 in survivorship (PG and PR). The locally adapted population from high latitudes (SB) saw an  
372 increase in survivorship. Generally, populations without differentiation of TPCs saw a decrease  
373 in survivorship at low latitudes (NS and SP) but an increase in survivorship at high latitudes (CT  
374 and ME).

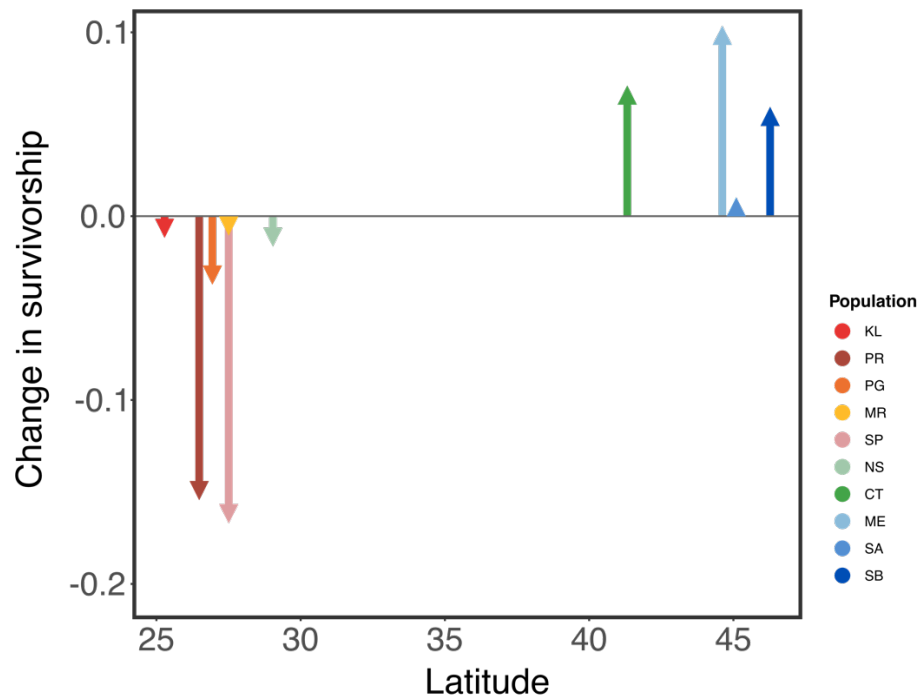

375

376 Figure 7: Vulnerability to predicted warming over the next century. Vulnerability is estimated as  
377 the change in survivorship at the mean monthly maximum temperature if the developmental  
378 temperature is assumed to be the mean monthly temperature. Positive changes represent an  
379 increase in survivorship while negative changes represent a decrease in survivorship. Estimates  
380 of the magnitude of warming and the temperature values used for estimating change in  
381 survivorship for each population can be found in Supp. Table 1.

### 382 Genetic Diversity and Gene Flow

383 A total of 228 COI sequences (aligned length: 562 base pairs) were used for the genetic analyses.  
384 COI sequences revealed high levels of genetic diversity (Table 5). Large variation between  
385 populations was observed in haplotype diversity ( $H_d$ ; 0.189 - 0.941), nucleotide diversity ( $\pi$ ;  
386 0.0029 - 0.079), and the average number of nucleotide differences between the haplotypes (1.47 -  
387 40.46).

388 Table 5: Population genetic summary statistics, as calculated by DNaSP.

| <b>Population</b> | <b>Individuals</b> | <b>Haplotypes</b> | <b>Haplotype Diversity</b> | <b>Nucleotide Diversity</b> | <b>Average Number of Nucleotide Differences</b> |
|-------------------|--------------------|-------------------|----------------------------|-----------------------------|-------------------------------------------------|
| KL                | 31                 | 2                 | 0.67527                    | 0.00526                     | 2.69                                            |
| PR                | 21                 | 11                | 0.85714                    | 0.03549                     | 18.17                                           |
| PG                | 19                 | 1                 | 0.66082                    | 0.01597                     | 8.17                                            |
| MR                | 34                 | 5                 | 0.94118                    | 0.07903                     | 40.46                                           |
| SP                | 20                 | 8                 | 0.84211                    | 0.0768                      | 39.32                                           |
| NS                | 17                 | 6                 | 0.83824                    | 0.00287                     | 1.47                                            |
| CT                | 22                 | 8                 | 0.77922                    | 0.0565                      | 26.71                                           |
| ME                | 20                 | 11                | 0.18947                    | 0.02072                     | 10.61                                           |
| SA                | 21                 | 18                | 0.74286                    | 0.03633                     | 18.60                                           |
| SB                | 23                 | 3                 | 0.74704                    | 0.01583                     | 8.11                                            |

389

390 In all, 73 unique haplotypes were identified, which segregated into four major clades (Fig. 8).  
391 Each clade was represented in populations from across a large geographic area, and most  
392 populations contained individuals from multiple clades. Additionally, we observed several  
393 instances of shared haplotypes between geographically distant populations (highlighted in Fig.  
394 8). As exceptions to this, the Key Largo, Punta Gorda, Manatee River, and Shediac Bay  
395 populations, each of which were characterized by differentiated thermal performance curves,  
396 were all largely represented by a single dominant haplotype each, which was generally not  
397 recovered from other populations. The dominant single haplotype is, however, shared between  
398 Punta Gorda and Manatee River. Estimates of the number of migrants from MigrateN varied  
399 greatly between populations, ranging between 2.6 to 107.7 per generation. There was a negative  
400 correlation between the number of migrants exchanged and the pairwise population difference in  
401 LD<sub>50</sub> values ( $p = 0.045$ ; Supp. Fig. 6). However, this correlation explained only a very small  
402 proportion of the variance ( $R^2 = 0.07$ ).



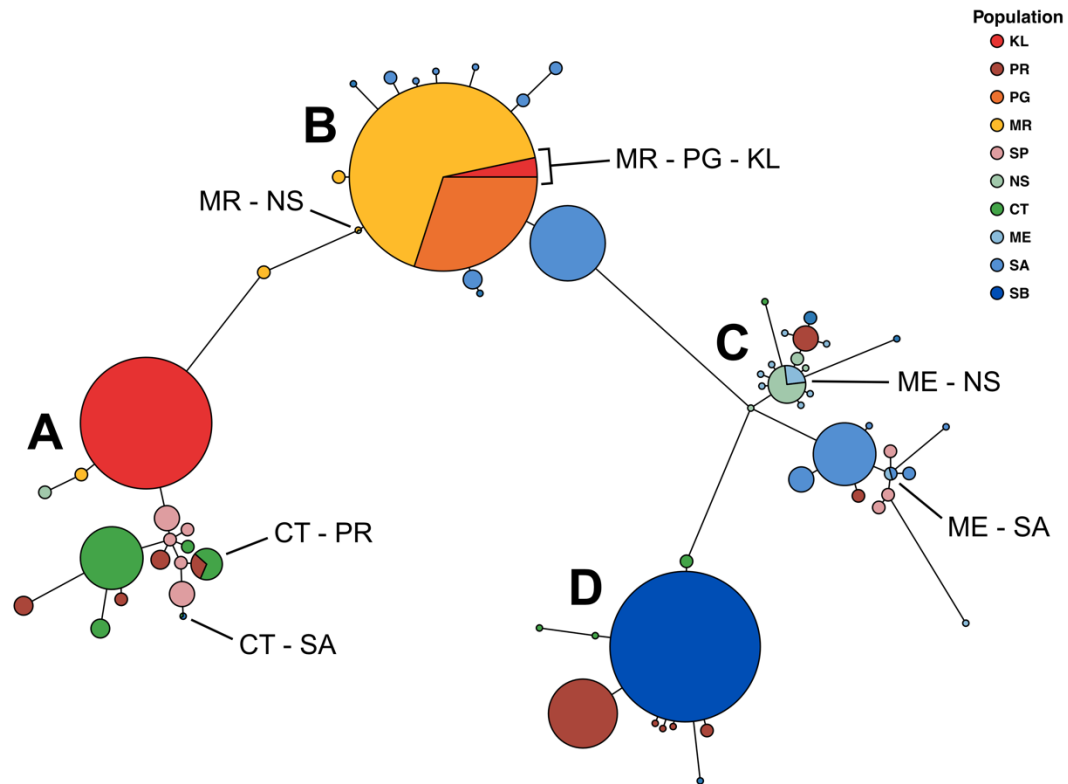

403

404 Figure 8: Mitochondrial COI haplotype network for *Acartia tonsa* sequences recovered from  
405 each of the ten populations. Individual circles represent unique haplotypes, with the size of each  
406 proportional to the haplotype's frequency. Connecting bar lengths are proportional to the number  
407 of base pair differences between haplotypes. Circles are colored based on the sequence  
408 population of origin. Shared haplotypes are labelled with the sampling sites they were recovered  
409 from. Four distinct clades are observed and labelled A – D.

410 **Discussion:**

411 Thermal tolerance and the strength of phenotypic plasticity both vary strongly among  
412 populations of *Acartia tonsa* from across the North Atlantic and Gulf of Mexico. This variation  
413 conforms to the predictions of the CVH (Janzen, 1967; Stevens, 1989), but may also be  
414 explained by Stillman's hypothesis regarding the trade-off between thermal tolerance and the  
415 strength of phenotypic plasticity (Stillman 2003). We also observed a surprising lack of  
416 differentiation of thermal performance across a large portion of the sampled range.  
417 Mitochondrial COI sequences suggest that this lack of differentiation is due to constraint by gene  
418 flow, rather than selection for a generalist performance curve. The patterns we observed in both  
419 thermal tolerance and the strength of phenotypic plasticity may result in regional differences in  
420 vulnerability to warming, with low latitude populations being the most vulnerable.

421 Patterns in Thermal Adaptation

422 Key Largo (KL), the southernmost population, had the highest thermal tolerance of the ten  
423 populations examined, followed by three populations from the Gulf of Mexico. The  
424 northernmost population, Shediac Bay (SB), had the lowest thermal tolerance but the largest  
425 strength of phenotypic plasticity. Manatee River (MR), one of the Gulf of Mexico populations  
426 with higher thermal tolerance, had the smallest strength of phenotypic plasticity. The CVH  
427 (Janzen, 1967; Stevens, 1989) predicts higher thermal tolerance in warmer environments and  
428 increased phenotypic plasticity in more variable environments. The results of our study are  
429 consistent with these predictions. We observed significant correlations between I) thermal  
430 tolerance and mean monthly temperature and II) the strength of phenotypic plasticity and mean  
431 monthly temperature variance. The observed patterns, however, may also be explained by a  
432 trade-off between thermal tolerance and phenotypic plasticity (Stillman, 2003). We observed a

433 significant negative relationship between thermal tolerance and the strength of phenotypic  
434 plasticity, but no significant correlation between mean monthly temperature and mean monthly  
435 temperature variance. Together, these observations might indicate that the trade-off proposed by  
436 Stillman (2003) has a strong influence on shaping patterns of adaptation in this taxon, as there is  
437 no covariance between environmental parameters that would drive the observed correlation  
438 between  $LD_{50}$  and  $\Delta LD_{50}$ . The few studies that have estimated the strength of selection on  
439 phenotypic plasticity generally indicate relatively weak selection (Arnold *et al.*, 2019). It is not  
440 implausible, therefore, that observed spatial patterns in phenotypic plasticity might instead be  
441 driven by patterns of selection for increased thermal tolerance. However, support for this  
442 hypothesis appears to be limited and species specific (Gunderson & Stillman, 2015), warranting  
443 investigation in additional species.

444 The negative relationship between thermal tolerance and the strength of phenotypic plasticity  
445 might reflect a role of genetic accommodation or “plasticity first” evolutionary change (Scheiner  
446 *et al.*, 2017; Kelly, 2019; Levis & Pfennig, 2016; Levis *et al.*, 2017; Pfennig *et al.*, 2010;  
447 Pigliucci *et al.*, 2006; Price *et al.*, 2003; West-Eberhard, 2005; 2003), wherein phenotypic  
448 modification by plasticity becomes canalized or fixed by genetic mechanisms, resulting in the  
449 loss of capacity for plastic change. The Manatee River - St. Petersburg (MR - SP) comparison  
450 best illustrates this in our study. These sites are in close proximity to each other (a feature  
451 discussed further below) but exhibit strong differences in both thermal tolerance and the strength  
452 of phenotypic plasticity. St. Petersburg had a lower thermal tolerance in the 18°C developmental  
453 temperature group, but larger strengths of phenotypic plasticity than Manatee River. Increasing  
454 developmental temperature reduces the difference in thermal tolerance between the two  
455 populations. If we assume that these two populations share an ancestral phenotype similar to the  
456 contemporary St. Petersburg population, the elevated thermal tolerance but reduced plasticity in

457 Manatee River may reflect the fixation of changes originally induced by phenotypic plasticity in  
458 the Manatee River population. However, this is the only population pair where this is observed  
459 (the Punta Gorda (PG), Punta Rasa (PR), and Key Largo (KL) populations all had comparable or  
460 higher thermal tolerance values but larger strengths of phenotypic plasticity than the Manatee  
461 River population), suggesting that there may be several alternative evolutionary mechanisms at  
462 play across larger spatial scales.

### 463 Spatial Scales of Adaptation - Gene flow vs. Selection

464 Local adaptation within the range of dispersal, so called microgeographic adaptation (Richardson  
465 *et al.*, 2014), has garnered increased attention. “Microgeographic” may be a misleading term in  
466 marine systems though, as dispersal kernels can encompass hundreds of kilometers (Cowen &  
467 Sponaugle, 2009; Kinlan & Gaines, 2003; Kinlan *et al.*, 2005). The lack of differentiation we  
468 observed over a large geographic area, ranging from the Gulf of Mexico to the Bay of Fundy, is  
469 in agreement with the expectation of high levels of gene flow in pelagic copepods and other  
470 planktonic taxa. The wide distribution of genetic clades, several instances of shared haplotypes  
471 between distant populations, and the negative correlation between number of migrants and the  
472 pairwise difference in  $LD_{50}$  suggests that gene flow can be strong enough to constrain the  
473 adaptive divergence of thermal performance curves in this taxon. Direct dispersal across these  
474 large distances within the short generation times of *A. tonsa* is unlikely. Instead, dispersal may  
475 follow a stepping-stone model (Kimura & Weiss, 1964), as is common in other coastal and  
476 estuarine taxa (Hellberg, 1995; BurrIDGE *et al.*, 2004; Williams *et al.*, 2008; Ragionieri *et al.*,  
477 2010; Crandall *et al.*, 2012).

478 In stark contrast to this pattern of long-distance connectivity, we also observed significant  
479 differentiation of TPCs over spatial scales of less than ten kilometers, suggestive of

480 microgeographic adaptation. Copepods from the Manatee River (MR) and St. Petersburg (SP)  
481 sites were collected from either side of a strong salinity gradient, with the salinity at the St.  
482 Petersburg collection site approaching full oceanic levels (32 psu) and the Manatee River site  
483 strongly influenced by riverine input (5 psu). Adaptation to salinity has been shown to  
484 correspond with reproductive isolation in other populations of *Acartia tonsa* (Plough *et al.*,  
485 2018). In this case, dispersal and gene flow may be strongly limited by this salinity gradient,  
486 allowing for the local adaptation of the thermal performance curve in the Manatee River  
487 population, while the St. Petersburg population remains under the constraining influence of gene  
488 flow from other environments. This is supported by the population genetic data; the Manatee  
489 River individuals are almost entirely represented by a single haplotype in Clade B, while St.  
490 Petersburg individuals are represented by several different haplotypes in clades A, C, and D. No  
491 haplotypes are shared between these two sites, despite their distinct geographic proximity. It  
492 should also be noted that the major haplotype found at Manatee River represents the only  
493 haplotype found at Punta Gorda (PG), the other low salinity site included in this study. However,  
494 unlike in the Manatee River - St. Petersburg comparison, the Punta Gorda (PG) and the adjacent  
495 Punta Rasa (PR) populations share a similar TPC, despite being genetically distinct. The  
496 apparent local adaptation of both populations suggests that factors other than salinity may also  
497 contribute to isolation and the reduction of gene flow between Punta Rasa and other sites.

498 Interestingly, differentiation of TPCs occurs predominantly within clades rather than between  
499 clades, suggesting a rapid rate of thermal adaptation relative to the differentiation of the COI  
500 marker region. Each clade contains several distinct thermal phenotypes. Clade A for example  
501 contains populations representing three of the distinct groups of TPCs. This appears to be true for  
502 both temperature and salinity conditions, as clade B is recovered from warm and fresh sites like  
503 Manatee River (MR) and Punta Gorda (PG) as well as cold and high salinity sites like St.

504 Andrew (SA). The generally large capacity for plasticity observed in *Acartia tonsa* may promote  
505 this wide distribution of clades across environmental conditions. Phenotypic plasticity may allow  
506 migrants to survive in a wider range of environments, thus increasing gene flow and constraining  
507 local adaptation (Crispo, 2008; Thibert-Plante & Hendry, 2011).

508 Of course, as is the case for all single-gene markers studies, our results must be interpreted with  
509 caution. Single-gene markers are vulnerable to incomplete lineage sorting (Nichols, 2001), and  
510 may obscure important patterns in genetic structuring. Genome-scale data would provide many  
511 more markers for population genomic assessment of structure and gene flow, but for the  
512 purposes of this study COI sequences provide robust evidence for where, across the examined  
513 range, gene flow may be potentially restricting adaptive divergence of performance curves.

#### 514 Vulnerability to Climate Change

515 Because copepods are key components in marine ecosystems and biogeochemical cycles  
516 determining their susceptibility to warming is essential for predicting the fate of the oceanic biota  
517 in light of climate change. An increasingly large body of literature has recognized the important  
518 role phenotypic plasticity may play in determining organismal responses to rapid climate change  
519 (Somero, 2010). Much of this literature has focused on acclimation or hardening, but our results  
520 show clearly that developmental phenotypic plasticity also deserves increased scrutiny as a factor  
521 affecting vulnerability (Burggren, 2018). In most of the populations examined, we observed an  
522 almost 1:1 relationship between the increase in thermal tolerance compared with the increase in  
523 developmental temperature. Strong phenotypic plasticity like this may reduce vulnerability to  
524 rapid climate change by providing a mechanism for correspondingly rapid phenotypic change.  
525 However, developmental phenotypic plasticity had a weaker effect on thermal limits than  
526 thermal tolerance ( $\Delta LD_{10} < \Delta LD_{50}$ ; Supp. Fig. 1). The apparent constraint of upper thermal limits

527 suggests that accommodation of future warming by plasticity alone may increase vulnerability to  
528 extreme temperature events like heatwaves (Meehl, 2004; Perkins *et al.*, 2012), as the difference  
529 between environmental temperature and thermal limits decreases.

530 In addition to strong phenotypic plasticity, the high levels of genetic diversity, a large potential  
531 for gene flow, and the apparently rapid rate of thermal adaptation (when gene flow is weak)  
532 would also suggest reduced vulnerability to warming. Selection on standing genetic variation  
533 may provide a rapid response to change (Pantel *et al.*, 2015; Barrett & Schluter, 2008; Torda *et*  
534 *al.*, 2017). Plasticity may also play a role in increasing or maintaining migration between  
535 populations, indirectly supporting evolutionary rescue (Crispo, 2008). Paired with the high levels  
536 of standing genetic diversity observed both within and between populations, increasing migration  
537 success may reduce vulnerability. This makes understanding oceanographic effects of climate  
538 change an important prerequisite for predicting biotic responses, as changes in ocean current  
539 patterns may strongly affect the potential for gene flow between populations. Reductions in gene  
540 flow may promote local adaptation, thus reducing vulnerability, while an increase in gene flow  
541 could strongly increase vulnerability to climate change if existing local adaptation is eroded by  
542 gene swamping (Lenormand, 2002).

543 Vulnerability will also be affected by the pre-existing spatial patterns in adaptation. Using the  
544 current and predicted temperatures at each site, we observed large variation in the potential  
545 change in survivorship at maximum temperatures. In the southern range, warming generally had  
546 little effect on survivorship at the maximum temperature in locally adapted populations, likely  
547 due to accommodation by developmental phenotypic plasticity. While the response was mixed,  
548 non-differentiated populations (those constrained by gene flow) may be strongly affected by  
549 warming; the St. Petersburg (SP) population saw the largest decrease in survivorship. Both non-

550 differentiated and locally adapted populations from higher latitudes generally saw increased  
551 survivorship. Stronger predicted warming in this region may drive a larger increase in thermal  
552 tolerance due to developmental phenotypic plasticity, especially in the northernmost population  
553 Shediac Bay (SB), which had the largest strength of phenotypic plasticity. In general, local  
554 adaptation to increased temperature does not appear to increase vulnerability to warming,  
555 contrary to what has been previously suggested for warm-adapted tropical species (Somero,  
556 2010; Tewksbury *et al.*, 2008; Nguyen *et al.*, 2011). However, this is likely highly regionally  
557 specific; the second largest decrease in survivorship was predicted for one of the locally adapted  
558 populations, Punta Rasa (PR), from the Gulf of Mexico.

559 Our analysis incorporates population differences in both thermal tolerance and the strength of  
560 phenotypic plasticity to provide a more robust estimate of vulnerability. Previous work also  
561 indicated that warm-adapted low latitude populations may be more vulnerable to warming, as  
562 they already experience temperatures near their thermal limits (Sasaki *et al.*, 2019). This study  
563 refines that prediction with the inclusion of more populations from a wider range of thermal  
564 environments, and the integration of population genetic data. However, our analysis cannot  
565 account for other important factors that will also likely play a large role in determining  
566 vulnerability to climate change. Factors such as changing food quality and quantity (Gregg *et al.*,  
567 2003; Van der Waal *et al.*, 2010; Paul *et al.*, 2015; Hixon & Arts, 2016; Dutkiewicz *et al.*, 2019),  
568 changes in predation pressure (Broitman *et al.*, 2009; Rall *et al.*, 2009; De Block *et al.*, 2013;  
569 Allan *et al.*, 2015), phenological mismatches between copepods, their prey, and their predators  
570 (Edwards & Richardson, 2004; Søreide *et al.*, 2010; Brown *et al.*, 2016), changes in behavior  
571 (Kearney *et al.*, 2009; Marshall *et al.*, 2013; Nagelkerken & Munday, 2015), and changing  
572 direction or magnitude of gene flow between populations all might strongly shape population  
573 vulnerability to climate change. Our analysis also assumes that populations are not undergoing



574 range shifts or further evolutionary adaptation. Despite these limitations, our results provide a  
575 representative baseline estimate of vulnerability incorporating several different adaptive  
576 mechanisms.

577 The major conclusions of this study are possible only through the integration of physiological  
578 experiments and molecular ecology. On their own, the thermal performance curves cannot  
579 differentiate the potential explanations for the lack of divergence observed across large distances,  
580 selection for a generalist performance curve or gene flow over evolutionary timescales. The  
581 population genetic insights alone are not enough to infer vulnerability. We demonstrate that tight  
582 integration between different fields can provide a more comprehensive understanding of the  
583 factors determining vulnerability to climate change.

#### 584 **Acknowledgements:**

585 We thank Dr. Ann Bucklin for helpful comments on the analysis of the molecular data, and Dr.  
586 Kendra Daly for assistance sampling in St. Petersburg. Research was supported by grants NSF-  
587 OCE 1559180 and CT Sea Grant R/LR-25, a Research Council grant from the University of  
588 Connecticut, and graduate research fellowships from the Department of Marine Sciences,  
589 University of Connecticut, USA.

#### 590 **References:**

591 Addo-Bediako, A., Chown, S., & Gaston, K. (2000). Thermal tolerance, climatic variability and  
592 latitude. *Proceedings of the Royal Society B: Biological Sciences*, 267(1445), 739-745.  
593 <https://doi.org/10.1098/rspb.2000.1065>

- 594 Aguilera, V. M., Vargas, C. A., Lardies, M. A., & Poupin, M. J. (2016). Adaptive variability to  
595 low-pH river discharges in *Acartia tonsa* and stress responses to high pCO<sub>2</sub> conditions. *Marine*  
596 *Ecology*, 37(1), 215–226. <https://doi.org/10.1111/maec.12282>
- 597 Allan, B. J., Domenici, P., Munday, P. L., & McCormick, M. I. (2015). Feeling the heat: the  
598 effect of acute temperature changes on predator–prey interactions in coral reef fish. *Conservation*  
599 *Physiology*, 3(1), cov011. <https://doi.org/10.1093/conphys/cov011>
- 600 Angilletta, M. J. (2009). Thermal adaptation: a theoretical and empirical analysis. New York,  
601 USA: *Oxford University Press Inc.* DOI:10.1093/acprof:oso/9780198570875.001.1
- 602 Arnold, P. A., Nicotra, A. B., & Kruuk, L. E. (2019). Sparse evidence for selection on  
603 phenotypic plasticity in response to temperature. *Philosophical Transactions of the Royal Society*  
604 *B*, 374(1768), 20180185. <https://doi.org/10.1098/rstb.2018.0185>
- 605 Ayriñac, A., Debat, V., Gibert, P., & Kister, A. (2004). Cold adaptation in geographical  
606 populations of *Drosophila melanogaster*: phenotypic plasticity is more important than genetic  
607 variability. *Functional Ecology*, 18(5), 700-706. <https://doi.org/10.1111/j.0269->  
608 [8463.2004.00904.x](https://doi.org/10.1111/j.0269-8463.2004.00904.x)
- 609 Barrett, R., & Schluter, D. (2008). Adaptation from standing genetic variation. *Trends in Ecology*  
610 *& Evolution*, 23(1), 38–44. <https://doi.org/10.1016/j.tree.2007.09.008>
- 611 Beerli, P. (2006). Comparison of Bayesian and maximum-likelihood inference of population  
612 genetic parameters. *Bioinformatics*, 22(3), 341–345.  
613 <https://doi.org/10.1093/bioinformatics/bti803>

- 614 Beerli, P., & Felsenstein, J. (2001). Maximum likelihood estimation of a migration matrix and  
615 effective population sizes in n subpopulations by using a coalescent approach. *Proceedings of the*  
616 *National Academy of Sciences*, 98(8), 4563-4568. <https://doi.org/10.1073/pnas.081068098>
- 617 Bennett, S., Wernberg, T., Joy, B. A., De Bettignies, T., & Campbell, A. H. (2015). Central and  
618 rear-edge populations can be equally vulnerable to warming. *Nature Communications*, 6(10280),  
619 1-7. <https://doi.org/10.1038/ncomms10280>
- 620 Blanquart, F., Kaltz, O., Nuismer, S. L., & Gandon, S. (2013). A practical guide to measuring  
621 local adaptation. *Ecology letters*, 16(9), 1195-1205. <https://doi.org/10.1111/ele.12150>
- 622 Bowen, B. W., Gaither, M. R., DiBattista, J. D., Iacchei, M., Andrews, K. R., Grant, S. W.,  
623 Toonen, R. J., & Briggs, J. C. (2016). Comparative phylogeography of the ocean planet.  
624 *Proceedings of the National Academy of Sciences*, 113(29), 7962-7969.  
625 <https://doi.org/10.1073/pnas.1602404113>
- 626 Bradley, B. P. (1978). Genetic and physiological adaptation of the copepod *Eurytemora affinis* to  
627 seasonal temperatures. *Genetics*, 90(1), 193-205.
- 628 Broitman, B. R., Szathmary, P. L., Mislán, K. A. S., Blanchette, C. A., & Helmuth, B. (2009).  
629 Predator–prey interactions under climate change: the importance of habitat vs body  
630 temperature. *Oikos*, 118(2), 219-224. <https://doi.org/10.1111/j.1600-0706.2008.17075.x>
- 631 Brown, C. J., Fulton, E. A., Hobday, A. J., Matear, R. J., Possingham, H. P., Bulman, C.,  
632 Griffiths, S. P., Lozano-Montes, H., Martin, J. M., Metcalf, S., Okey, T. A., Watson, R., &  
633 Richardson, A. J. (2010). Effects of climate-driven primary production change on marine food

- 634 webs: implications for fisheries and conservation. *Global Change Biology*, 16(4), 1194-1212.  
635 <https://doi.org/10.1111/j.1365-2486.2009.02046.x>
- 636 Brown, C. J., O'Connor, M. I., Poloczanska, E. S., Schoeman, D. S., Buckley, L. B., Burrows, M.  
637 T., Duarte, C. M., Halpern, B. S., Pandolfi, J. M., Parmesan, C., & Richardson, A. J. (2016).  
638 Ecological and methodological drivers of species' distribution and phenology responses to  
639 climate change. *Global change biology*, 22(4), 1548-1560. <https://doi.org/10.1111/gcb.13184>
- 640 Bryndum-Buchholz, A., Tittensor, D. P., Blanchard, J. L., Cheung, W. W., Coll, M., Galbraith,  
641 E. D., Jennings, S., Galbraith, E. D., & Lotze, H. K. (2019). Twenty-first-century climate change  
642 impacts on marine animal biomass and ecosystem structure across ocean basins. *Global Change*  
643 *Biology*, 25(2), 459–472. <https://doi.org/10.1111/gcb.14512>
- 644 Burggren, W. (2018). Developmental phenotypic plasticity helps bridge stochastic weather  
645 events associated with climate change. *Journal of Experimental Biology*, 221(9), jeb161984.  
646 <https://doi.org/10.1242/jeb.161984>
- 647 Burridge, C. P., Hurt, A. C., Farrington, L. W., Coutin, P. C., & Austin, C. M. (2004). Stepping  
648 stone gene flow in an estuarine-dwelling sparid from south-east Australia. *Journal of Fish*  
649 *Biology*, 64(4), 805-819. <https://doi.org/10.1111/j.1095-8649.2004.0347.x>
- 650 Calosi, P., Bilton, D. T., & Spicer, J. I. (2007). Thermal tolerance, acclimatory capacity and  
651 vulnerability to global climate change. *Biology letters*, 4(1), 99-102.  
652 <https://doi.org/10.1098/rsbl.2007.0408>

- 653 Campbell-Staton, S. C., Cheviron, Z. A., Rochette, N., Catchen, J., Losos, J. B., & Edwards, S.  
654 V. (2017). Winter storms drive rapid phenotypic, regulatory, and genomic shifts in the green  
655 anole lizard. *Science*, 357(6350), 495–498. <https://doi.org/10.1126/science.aam5512>
- 656 Carlton, J. T., Chapman, J. W., Geller, J. B., Miller, J. A., Carlton, D. A., McCuller, M. I.,  
657 Treneman, N. C., Steves, B. P., & Ruiz, G. M. (2017). Tsunami-driven rafting: Transoceanic  
658 species dispersal and implications for marine biogeography. *Science*, 357(6358), 1402–1406.  
659 <https://doi.org/10.1126/science.aao1498>
- 660 Castañeda, L. E., Rezende, E. L., & Santos, M. (2015). Heat tolerance in *Drosophila subobscura*  
661 along a latitudinal gradient: Contrasting patterns between plastic and genetic responses.  
662 *Evolution*, 69(10), 2721–2734. <https://doi.org/10.1111/evo.12757>
- 663 Castonguay, M., Plourde, S., Robert, D., Runge, J. A., & Fortier, L. (2008). Copepod production  
664 drives recruitment in a marine fish. *Canadian Journal of Fisheries and Aquatic Sciences*, 65(8),  
665 1528–1531. <https://doi.org/10.1139/f08-126>
- 666 Caudill, C. C., & Bucklin, A. (2004). Molecular Phylogeography and Evolutionary History of the  
667 Estuarine Copepod, *Acartia tonsa*, on the Northwest Atlantic Coast. *Hydrobiologia*, 511(1–3),  
668 91–102. <https://doi.org/10.1023/b:hydr.0000014032.05680.9d>
- 669 Chen, G., & Hare, M. P. (2011). Cryptic diversity and comparative phylogeography of the  
670 estuarine copepod *Acartia tonsa* on the US Atlantic coast. *Molecular Ecology*, 20(11), 2425–  
671 2441. <https://doi.org/10.1111/j.1365-294x.2011.05079.x>
- 672 Cheng, L., Abraham, J., Hausfather, Z., & Trenberth, K. E. (2019a). How fast are the oceans  
673 warming? *Science*, 363(6423), 128–129. <https://doi.org/10.1126/science.aav7619>

- 674 Cheng, L., Zhu, J., Abraham, J., Trenberth, K. E., Fasullo, J. T., Zhang, B., Yu, F., Wan, L.  
675 Chen, X., & Song, X. (2019b). 2018 Continues Record Global Ocean Warming. *Advances in*  
676 *Atmospheric Sciences*, 36(3), 249-252. <https://doi.org/10.1007/s00376-019-8276-x>
- 677 Chevin, L.-M., Lande, R., & Mace, G. M. (2010). Adaptation, Plasticity, and Extinction in a  
678 Changing Environment: Towards a Predictive Theory. *PLoS Biology*, 8(4), e1000357 8.  
679 <https://doi.org/10.1371/journal.pbio.1000357>
- 680 Chown, S., Gaston, K., & Robinson, D. (2004). Macrophysiology: large-scale patterns in  
681 physiological traits and their ecological implications. *Functional Ecology*. 18(2), 159-167.  
682 <https://doi.org/10.1111/j.0269-8463.2004.00825.x>
- 683 Chown, S. L., Slabber, S., McGeoch, M. A., Janion, C., & Leinaas, H. (2007). Phenotypic  
684 plasticity mediates climate change responses among invasive and indigenous arthropods.  
685 *Proceedings of the Royal Society B: Biological Sciences*, 274(1625), 2531–2537.  
686 <https://doi.org/10.1098/rspb.2007.0772>
- 687 Colin, S. P., & Dam, H. (2002a). Latitudinal differentiation in the effects of the toxic  
688 dinoflagellate *Alexandrium* spp. on the feeding and reproduction of populations of the copepod  
689 *Acartia hudsonica*. *Harmful Algae*, 1(1), 113 125. [https://doi.org/10.1016/s1568-9883\(02\)00007-](https://doi.org/10.1016/s1568-9883(02)00007-0)  
690 0
- 691 Colin, S. P., & Dam, H. (2002b). Testing for toxic effects of prey on zooplankton using sole  
692 versus mixed diets. *Limnology and Oceanography*. 46(5), 1430-1437.  
693 <https://doi.org/10.4319/lo.2002.47.5.1430>

- 694 Comte, L., & Olden, J. D. (2017). Climatic vulnerability of the world's freshwater and marine  
695 fishes. *Nature Climate Change*, 7(10), 1-6. <https://doi.org/10.1038/nclimate3382>
- 696 Corbett-Detig, R. B., Hartl, D. L., & Sackton, T. B. (2015). Natural selection constrains neutral  
697 diversity across a wide range of species. *PLoS Biology*, 13(4), e1002112 25.  
698 <https://doi.org/10.1371/journal.pbio.1002112>
- 699 Cowen, R. K., Paris, C., & Srinivasan, A. (2006). Scaling of connectivity in marine populations.  
700 *Science*, 311(5760), 522-527. <https://doi.org/10.1126/science.1122039>
- 701 Cowen, R. K., & Sponaugle, S. (2009). Larval dispersal and marine population connectivity.  
702 *Annual Review of Marine Science*, 1(1), 443–466.  
703 <https://doi.org/10.1146/annurev.marine.010908.163757>
- 704 Crandall, E. D., Treml, E. A., & Barber, P. H. (2012). Coalescent and biophysical models of  
705 stepping-stone gene flow in neritid snails. *Molecular Ecology*, 21(22), 5579-5598.  
706 <https://doi.org/10.1111/mec.12031>
- 707 Crispo, E. (2008). Modifying effects of phenotypic plasticity on interactions among natural  
708 selection, adaptation and gene flow. *Journal of Evolutionary Biology*, 21(6), 1460-1469.  
709 <https://doi.org/10.1111/j.1420-9101.2008.01592.x>
- 710 Dam, H. G. (2013). Evolutionary adaptation of marine zooplankton to global change. *Annual*  
711 *Review of Marine Science*, 5(1), 349–370. [https://doi.org/10.1146/annurev-marine-121211-](https://doi.org/10.1146/annurev-marine-121211-172229)  
712 [172229](https://doi.org/10.1146/annurev-marine-121211-172229)
- 713 Dam, H. G., & Baumann, H. (2017). Climate change, zooplankton and fisheries. *Climate Change*  
714 *Impacts on Fisheries and Aquaculture: A Global Analysis*, 2, 851-874.

- 715 De Block, M., Pauwels, K., Van Den Broeck, M., De Meester, L., & Stoks, R. (2013). Local  
716 genetic adaptation generates latitude-specific effects of warming on predator–prey  
717 interactions. *Global Change Biology*, *19*(3), 689-696. <https://doi.org/10.1111/gcb.12089>
- 718 Deutsch, C. A., Tewksbury, J. J., Huey, R. B., Sheldon, K. S., Ghalambor, C. K., Haak, D. C., &  
719 Martin, P. R. (2008). Impacts of climate warming on terrestrial ectotherms across latitude.  
720 *Proceedings of the National Academy of Sciences of the United States of America*, *105*(18),  
721 6668-6672. <https://doi.org/10.1073/pnas.0709472105>
- 722 Dionne, M., Caron, F., Dodson, J. J., & Bernatchez, L. (2008). Landscape genetics and  
723 hierarchical genetic structure in Atlantic salmon: the interaction of gene flow and local  
724 adaptation. *Molecular Ecology*, *17*(10), 2382-2396. [https://doi.org/10.1111/j.1365-](https://doi.org/10.1111/j.1365-294x.2008.03771.x)  
725 [294x.2008.03771.x](https://doi.org/10.1111/j.1365-294x.2008.03771.x)
- 726 Dutkiewicz, S., Hickman, A. E., Jahn, O., Henson, S., Beaulieu, C., & Monier, E. (2019). Ocean  
727 colour signature of climate change. *Nature communications*, *10*(1), 578.  
728 <https://doi.org/10.1038/s41467-019-08457-x>
- 729 Edwards, M., & Richardson, A. J. (2004). Impact of climate change on marine pelagic  
730 phenology and trophic mismatch. *Nature*, *430*(7002), 881. <https://doi.org/10.1038/nature02808>
- 731 Folmer, O., Hoeh, W., Black, M., & Vrijenhoek, R. (1994). Conserved primers for PCR  
732 amplification of mitochondrial DNA from different invertebrate phyla. *Molecular Marine*  
733 *Biology and Biotechnology*, *3*, 294-299.
- 734 Friedland, K. D., Stock, C., Drinkwater, K. F., Link, J. S., Leaf, R. T., Shank, B. V., Rose, J. M.,  
735 Pilskaln, C. H., & Fogarty, M. J. (2012). Pathways between primary production and fisheries



- 736 yields of large marine ecosystems. *PLoS ONE*, 7(1), e28945 11.  
737 <https://doi.org/10.1371/journal.pone.0028945>
- 738 Friedrich, S., & Meyer, A. (2016). How plasticity, genetic assimilation and cryptic genetic  
739 variation may contribute to adaptive radiations. *Molecular Ecology*, 26(1), 330-350.  
740 <https://doi.org/10.1111/mec.13880>
- 741 Fusi, M., Giomi, F., Babbini, S., Daffonchio, D., McQuaid, C. D., Porri, F., & Cannicci, S.  
742 (2015). Thermal specialization across large geographical scales predicts the resilience of  
743 mangrove crab populations to global warming. *Oikos*, 124(6), 784-795.  
744 <https://doi.org/10.1111/oik.01757>
- 745 Gaitán-Espitia, J., Bacigalupe, L. D., Opitz, T., Lagos, N. A., Osoreo, S., & Lardies, M. A.  
746 (2017). Exploring physiological plasticity and local thermal adaptation in an intertidal crab along  
747 a latitudinal cline. *Journal of Thermal Biology*, 68, 14-20.  
748 <https://doi.org/10.1016/j.jtherbio.2017.02.011>
- 749 Garant, D., Forde, S. E., & Hendry, A. P. (2007). The multifarious effects of dispersal and gene  
750 flow on contemporary adaptation. *Functional Ecology*, 21(3), 434-443.  
751 <https://doi.org/10.1111/j.1365-2435.2006.01228.x>
- 752 Gélín, P., Fauvelot, C., Mehn, V., Bureau, S., Rouzé, H., & Magalon, H. (2017). Superclone  
753 expansion, long-distance clonal dispersal and local genetic structuring in the coral *Pocillopora*  
754 *damicornis* Type  $\beta$  in Reunion Island, South Western Indian Ocean. *PLoS ONE*, 12(1), e0169692  
755 19. <https://doi.org/10.1371/journal.pone.0169692>

- 756 González, J. (1974). Critical thermal maxima and upper lethal temperatures for the calanoid  
757 copepods *Acartia tonsa* and *A. clausi*. *Marine Biology*, 27(3), 219-223.  
758 <https://doi.org/10.1007/BF00391947>
- 759 Gregg, W. W., Conkright, M. E., Ginoux, P., O'Reilly, J. E., & Casey, N. W. (2003). Ocean  
760 primary production and climate: Global decadal changes. *Geophysical Research Letters*, 30(15).  
761 <https://doi.org/10.1029/2003GL016889>
- 762 Gunderson, A., & Stillman, J. (2015). Plasticity in thermal tolerance has limited potential to  
763 buffer ectotherms from global warming. *Proceedings of the Royal Society B: Biological  
764 Sciences*, 282(1808), 20150401. <https://doi.org/10.1098/rspb.2015.0401>
- 765 Hellberg, M. E. (1995). Stepping-stone gene flow in the solitary coral *Balanophyllia elegans*:  
766 equilibrium and nonequilibrium at different spatial scales. *Marine Biology*, 123(3), 573-581.  
767 <https://doi.org/10.1007/BF00349236>
- 768 Hendry, A. P., & Taylor, E. B. (2004). How much of the variation in adaptive divergence can be  
769 explained by gene flow? An evaluation using lake-stream stickleback pairs. *Evolution*, 58(10),  
770 2319-2331. <https://doi.org/10.1111/j.0014-3820.2004.tb01606.x>
- 771 Hixson, S. M., & Arts, M. T. (2016). Climate warming is predicted to reduce omega-3, long-  
772 chain, polyunsaturated fatty acid production in phytoplankton. *Global Change Biology*, 22(8),  
773 2744-2755. <https://doi.org/10.1111/gcb.13295>
- 774 Hochachka, P. W., & Somero, G. N. (2002). Biochemical adaptation: mechanism and process in  
775 physiological evolution. New York, USA: Oxford University Press

- 776 Hoffmann, A. A., & Sgrò, C. (2011). Climate change and evolutionary adaptation. *Nature*,  
777 470(7335), 479-485. <https://doi.org/10.1038/nature09670>
- 778 Humes A.G. (1994). How many copepods? In: Ferrari F.D., Bradley B.P. (eds) Ecology and  
779 Morphology of Copepods. Developments in Hydrobiology, vol 102. Springer, Dordrecht
- 780 Janzen, D. (1967). Why mountain passes are higher in the tropics. *The American Naturalist*.  
781 101(919), 233-249. <https://doi.org/10.1086/282487>
- 782 Kearney, M., Shine, R., & Porter, W. P. (2009). The potential for behavioral thermoregulation to  
783 buffer “cold-blooded” animals against climate warming. *Proceedings of the National Academy of*  
784 *Sciences*, 106(10), 3835-3840. <https://doi.org/10.1073/pnas.0808913106>
- 785 Kellermann, V., van Heerwaarden, B., Sgrò, C. M., & Hoffmann, A. A. (2009). Fundamental  
786 evolutionary limits in ecological traits drive *Drosophila* species distributions. *Science*,  
787 325(5945), 1244–1246. <https://doi.org/10.1126/science.1175443>
- 788 Kelly, M. (2019). Adaptation to climate change through genetic accommodation and assimilation  
789 of plastic phenotypes. *Philosophical Transactions of the Royal Society B*, 374(1768), 20180176.  
790 <https://doi.org/10.1098/rstb.2018.0176>
- 791 Kimura, M., & Weiss, G. (1964). The stepping stone model of population structure and the  
792 decrease of genetic correlation with distance. *Genetics*, 49(4), 561-576.
- 793 Kinlan, B. P., & Gaines, S. D. (2003). Propagule dispersal in marine and terrestrial  
794 environments: a community perspective. *Ecology*, 84(8), 2007-2020. <https://doi.org/10.1890/01->  
795 0622

- 796 Kinlan, B. P., Gaines, S. D., & Lester, S. E. (2005). Propagule dispersal and the scales of marine  
797 community process. *Diversity and Distributions*, *11*(2), 139–148. <https://doi.org/10.1111/j.1366->  
798 [9516.2005.00158.x](https://doi.org/10.1111/j.1366-9516.2005.00158.x)
- 799 Leicht, K., Seppälä, K., & Seppälä, O. (2017). Potential for adaptation to climate change: family-  
800 level variation in fitness-related traits and their responses to heat waves in a snail population.  
801 *BMC Evolutionary Biology*, *17*(1). <https://doi.org/10.1186/s12862-017-0988-x>
- 802 Lenormand, T. (2002). Gene flow and the limits to natural selection. *Trends in Ecology &*  
803 *Evolution*, *17*(4), 183–189. [https://doi.org/10.1016/s0169-5347\(02\)02497-7](https://doi.org/10.1016/s0169-5347(02)02497-7)
- 804 Levis, N. A., & Pfennig, D. W. (2016). Evaluating ‘plasticity-first’ evolution in nature: key  
805 criteria and empirical approaches. *Trends in Ecology & Evolution*, *31*(7), 563-574.  
806 <https://doi.org/10.1016/j.tree.2016.03.012>
- 807 Levis, N., Serrato-Capuchina, A., & Pfennig, D. (2017). Genetic accommodation in the wild:  
808 evolution of gene expression plasticity during character displacement. *Journal of Evolutionary*  
809 *Biology*, *30*(9), 1712–1723. <https://doi.org/10.1111/jeb.13133>
- 810 Librado, P., & Rozas, J. (2009). DnaSP v5: a software for comprehensive analysis of DNA  
811 polymorphism data. *Bioinformatics*, *25*(11), 1451-1452.  
812 <https://doi.org/10.1093/bioinformatics/btp187>
- 813 Lonsdale, D. J., & Levinton, J. S. (1985). Latitudinal differentiation in copepod growth: an  
814 adaptation to temperature. *Ecology*, *66*(5), 1397-1403. <https://doi.org/10.2307/1938002>
- 815 Lorenzo, E., & Mantua, N. (2016). Multi-year persistence of the 2014/15 North Pacific marine  
816 heatwave. *Nature Climate Change*, *6*(11), 1042–1047. <https://doi.org/10.1038/nclimate3082>

- 817 Magozzi, S., & Calosi, P. (2014). Integrating metabolic performance, thermal tolerance, and  
818 plasticity enables for more accurate predictions on species vulnerability to acute and chronic  
819 effects of global warming. *Global Change Biology*, *21*(1), 181-194.  
820 <https://doi.org/10.1111/gcb.12695>
- 821 Marshall, D. J., Baharuddin, N., & McQuaid, C. D. (2013). Behaviour moderates climate  
822 warming vulnerability in high-rocky-shore snails: interactions of habitat use, energy  
823 consumption and environmental temperature. *Marine biology*, *160*(9), 2525-2530.  
824 <https://doi.org/10.1007/s00227-013-2245-1>
- 825 Mayr, E. (1963). Animal species and evolution. Cambridge, USA: *Harvard University Press*.
- 826 McManus, M., & Woodson, B. C. (2012). Plankton distribution and ocean dispersal. *Journal of*  
827 *Experimental Biology*, *215*(6), 1008–1016. <https://doi.org/10.1242/jeb.059014>
- 828 Meehl, G. (2004). More intense, more frequent, and longer lasting heat waves in the 21st  
829 century. *Science*, *305*(5686), 994-997. <https://doi.org/10.1126/science.1098704>
- 830 Menden-Deuer, S., & Kiørboe, T. (2016). Small bugs with a big impact: linking plankton  
831 ecology with ecosystem processes. *Journal of Plankton Research*, *38*(4), 1036–1043.  
832 <https://doi.org/10.1093/plankt/fbw049>
- 833 Merilä, J., & Hendry, A. P. (2014). Climate change, adaptation, and phenotypic plasticity: the  
834 problem and the evidence. *Evolutionary Applications*, *7*(1), 1-14.  
835 <https://doi.org/10.1111/eva.12137>

- 836 Moore, J.-S., Gow, J. L., Taylor, E. B., & Hendry, A. P. (2007). Quantifying the constraining  
837 influence of gene flow on adaptive divergence in the lake-stream threespine stickleback system.  
838 *Evolution*, 61(8), 2015–2026. <https://doi.org/10.1111/j.1558-5646.2007.00168.x>
- 839 Moore, J.-S., & Hendry, A. P. (2005). Both selection and gene flow are necessary to explain  
840 adaptive divergence: evidence from clinal variation in stream stickleback. *Evolutionary Ecology*  
841 *Research*, 7, 871–886.
- 842 Moran, E. V., Hartig, F., & Bell, D. M. (2016). Intraspecific trait variation across scales:  
843 implications for understanding global change responses. *Global Change Biology*, 22(1), 137–  
844 150. <https://doi.org/10.1111/gcb.13000>
- 845 Nagelkerken, I., & Munday, P. L. (2016). Animal behaviour shapes the ecological effects of  
846 ocean acidification and warming: moving from individual to community-level responses. *Global*  
847 *Change Biology*, 22(3), 974–989. <https://doi.org/10.1111/gcb.13167>
- 848 Nguyen, K. D. T., Morley, S. A., Lai, C. H., Clark, M. S., Tan, K. S., Bates, A. E., & Peck, L. S.  
849 (2011). Upper temperature limits of tropical marine ectotherms: global warming  
850 implications. *PLoS One*, 6(12), e29340. <https://doi.org/10.1371/journal.pone.0029340>
- 851 Nichols, R. (2001). Gene trees and species trees are not the same. *Trends in Ecology &*  
852 *Evolution*, 16(7), 358–364. [https://doi.org/10.1016/s0169-5347\(01\)02203-0](https://doi.org/10.1016/s0169-5347(01)02203-0)
- 853 Nosil, P., & Crespi, B. (2004). Does gene flow constrain adaptive divergence or vice versa? A  
854 test using ecomorphology and sexual isolation in *Timema cristinae* walking-sticks. *Evolution*,  
855 58(1), 102–112. <https://doi.org/10.1111/j.0014-3820.2004.tb01577.x>

- 856 Okonechnikov, K., Golosova, O., & Fursov, M. (2012). Unipro UGENE: a unified  
857 bioinformatics toolkit. *Bioinformatics*, 28(8), 1166–1167.  
858 <https://doi.org/10.1093/bioinformatics/bts091>
- 859 Palumbi, S. (2003). Population genetics, demographic connectivity, and the design of marine  
860 reserves. *Ecological Applications*, 13(1), S146–S158. [https://doi.org/10.1890/1051-0761\(2003\)013\[0146:PGDCAT\]2.0.CO;2](https://doi.org/10.1890/1051-0761(2003)013[0146:PGDCAT]2.0.CO;2)
- 862 Pantel, J. H., Duvivier, C., & Meester, L. (2015). Rapid local adaptation mediates zooplankton  
863 community assembly in experimental mesocosms. *Ecology Letters*, 18(10), 992–1000.  
864 <https://doi.org/10.1111/ele.12480>
- 865 Paradis, E. (2010). pegas: an R package for population genetics with an integrated–modular  
866 approach. *Bioinformatics*, 26(3), 419–420. <https://doi.org/10.1093/bioinformatics/btp696>
- 867 Parmesan, C. (2006). Ecological and evolutionary responses to recent climate change. *Annual  
868 Review of Ecology, Evolution, and Systematics*, 37(1), 637–669.  
869 <https://doi.org/10.1146/annurev.ecolsys.37.091305.110100>
- 870 Paul, C., Matthiessen, B., & Sommer, U. (2015). Warming, but not enhanced CO<sub>2</sub> concentration,  
871 quantitatively and qualitatively affects phytoplankton biomass. *Marine Ecology Progress  
872 Series*, 528, 39–51. <https://doi.org/10.3354/meps11264>
- 873 Pereira, R. J., Sasaki, M. C., & Burton, R. S. (2017). Adaptation to a latitudinal thermal gradient  
874 within a widespread copepod species: the contributions of genetic divergence and phenotypic  
875 plasticity. *Proceedings of the Royal Society B*, 284(1853), 20170236.  
876 <https://doi.org/10.1098/rspb.2017.0236>

- 877 Perkins, S., Alexander, L., & Nairn, J. (2012). Increasing frequency, intensity and duration of  
878 observed global heatwaves and warm spells. *Geophysical Research Letters*, 39(20), L20714.  
879 <https://doi.org/10.1029/2012gl053361>
- 880 Pfennig, D. W., Wund, M. A., Snell-Rood, E. C., Cruickshank, T., Schlichting, C. D., &  
881 Moczek, A. P. (2010). Phenotypic plasticity's impacts on diversification and speciation. *Trends*  
882 *in Ecology & Evolution*, 25(8), 459-467. <https://doi.org/10.1016/j.tree.2010.05.006>
- 883 Pigliucci, M., Murren, C. J., & Schlichting, C. D. (2006). Phenotypic plasticity and evolution by  
884 genetic assimilation. *Journal of Experimental Biology*, 209(12), 2362–2367.  
885 <https://doi.org/10.1242/jeb.02070>
- 886 Plough, L., Fitzgerald, C., Plummer, A., & Pierson, J. (2018). Reproductive isolation and  
887 morphological divergence between cryptic lineages of the copepod *Acartia tonsa* in Chesapeake  
888 Bay. *Marine Ecology Progress Series*, 597, 99–113. <https://doi.org/10.3354/meps12569>
- 889 Price, T. D., Qvarnström, A., & Irwin, D. E. (2003). The role of phenotypic plasticity in driving  
890 genetic evolution. *Proceedings of the Royal Society of London. Series B: Biological Sciences*,  
891 270(1523), 1433–1440. <https://doi.org/10.1098/rspb.2003.2372>
- 892 R Core Team. 2016 R: A language and environment for statistical computing. R Foundation for  
893 Statistical Computing, Vienna, Austria. URL: <https://www.R-project.org/>
- 894 Ragionieri, L., Cannicci, S., Schubart, C. D., & Fratini, S. (2010). Gene flow and demographic  
895 history of the mangrove crab *Neosarmatium meinerti*: A case study from the western Indian  
896 Ocean. *Estuarine, Coastal and Shelf Science*, 86(2), 179-188.  
897 <https://doi.org/10.1016/j.ecss.2009.11.002>



- 898 Rall, B. C., Vucic-Pestic, O., Ehnes, R. B., Emmerson, M., & Brose, U. (2010). Temperature,  
899 predator–prey interaction strength and population stability. *Global Change Biology*, *16*(8), 2145-  
900 2157. <https://doi.org/10.1111/j.1365-2486.2009.02124.x>
- 901 Reusch, T. B. (2014). Climate change in the oceans: evolutionary versus phenotypically plastic  
902 responses of marine animals and plants. *Evolutionary applications*, *7*(1), 104-122.  
903 <https://doi.org/10.1111/eva.12109>
- 904 Richardson, J. L., Urban, M. C., Bolnick, D. I., & Skelly, D. K. (2014). Microgeographic  
905 adaptation and the spatial scale of evolution. *Trends in Ecology & Evolution*, *29*(3), 165-176.  
906 <https://doi.org/10.1016/j.tree.2014.01.002>
- 907 Roemmich, D., Church, J., Gilson, J., Monselesan, D., Sutton, P., & Wijffels, S. (2015).  
908 Unabated planetary warming and its ocean structure since 2006. *Nature Climate Change*, *5*(3),  
909 240-245. <https://doi.org/10.1038/nclimate2513>
- 910 Saba, V. S., Griffies, S. M., Anderson, W. G., Winton, M., Alexander, M. A., Delworth, T. L.,  
911 Hare, J. A., Harrison, M. J., Rosati, A., Vecchi, G. A., & Zhang, R. (2016). Enhanced warming  
912 of the Northwest Atlantic Ocean under climate change. *Journal of Geophysical Research:*  
913 *Oceans*, *121*(1), 118–132. <https://doi.org/10.1002/2015jc011346>
- 914 Sasaki, M. C., Hedberg, S., Richardson, K., & Dam, H. (2019). Complex interactions between  
915 local adaptation, phenotypic plasticity and sex affect vulnerability to warming in a widespread  
916 marine copepod. *Royal Society Open Science*, *6*(3), 182115 9.  
917 <https://doi.org/10.1098/rsos.182115>

- 918 Sayers, E. W., Cavanaugh, M., Clark, K., Ostell, J., Pruitt, K. D., & Karsch-Mizrachi, I. (2018).  
919 GenBank. *Nucleic Acids Research*, 47(D1), 94-99. <https://doi.org/10.1093/nar/gky989>
- 920 Scheiner, S., Barfield, M., & Holt, R. D. (2017). The genetics of phenotypic plasticity. XV.  
921 Genetic assimilation, the Baldwin effect, and evolutionary rescue. *Ecology and Evolution*,  
922 19(21), 8788-8803. <https://doi.org/10.1002/ece3.3429>
- 923 Schlichting, C. D. (2004). The role of phenotypic plasticity in diversification. In: T. J. DeWitt &  
924 S. M. Scheiner (Eds.), *Phenotypic Plasticity: Functional and Conceptual Approaches* (pp. 191-  
925 200). New York, USA: Oxford University Press.
- 926 Schulzweida, U., Kornblueh, L., & Quast, R. (2009). Climate Data Operators. User's Guide.
- 927 Seebacher, F., & Grigaltchik, V. S. (2014). Embryonic developmental temperatures modulate  
928 thermal acclimation of performance curves in tadpoles of the frog *Limnodynastes peronii*. *PLoS*  
929 *ONE*, 9(9), e106492. <https://doi.org/10.1371/journal.pone.0106492>
- 930 Sexton, P. F., & Norris, R. D. (2008). Dispersal and biogeography of marine plankton: Long-  
931 distance dispersal of the foraminifer *Truncorotalia truncatulinoides*. *Geology*, 36(11), 899-902.  
932 <https://doi.org/10.1130/g25232a.1>
- 933 Slatkin, M. (1985). Rare alleles as indicators of gene flow. *Evolution*, 39(1), 53-65.  
934 <https://doi.org/10.1111/j.1558-5646.1985.tb04079.x>
- 935 Slatkin, M. (1987). Gene flow and the geographic structure of natural populations. *Science*,  
936 236(4803), 787-792. <https://doi.org/10.1126/science.3576198>

- 937 Smolina, I., Harmer, R., Lindeque, P., & Hoarau, G. (2016). Reduced up-regulation of gene  
938 expression in response to elevated temperatures in the mid-Atlantic population of *Calanus*  
939 *finmarchicus*. *Journal of Experimental Marine Biology and Ecology*, 485, 88–93.  
940 <https://doi.org/10.1016/j.jembe.2016.09.003>
- 941 Somero, G. N. (2010). The physiology of climate change: how potentials for acclimatization and  
942 genetic adaptation will determine “winners” and “losers”. *The Journal of Experimental Biology*,  
943 213(6), 912-920. <https://doi.org/10.1242/jeb.037473>
- 944 Søreide, J. E., Leu, E. V. A., Berge, J., Graeve, M., & Falk-Petersen, S. T. I. G. (2010). Timing  
945 of blooms, algal food quality and *Calanus glacialis* reproduction and growth in a changing  
946 Arctic. *Global change biology*, 16(11), 3154-3163. [https://doi.org/10.1111/j.1365-](https://doi.org/10.1111/j.1365-2486.2010.02175.x)  
947 [2486.2010.02175.x](https://doi.org/10.1111/j.1365-2486.2010.02175.x)
- 948 Sørensen, J. G., Dahlgaard, J., & Loeschcke, V. (2001). Genetic variation in thermal tolerance  
949 among natural populations of *Drosophila buzzatii*: down regulation of Hsp70 expression and  
950 variation in heat stress resistance traits. *Functional Ecology*, 15(3), 289-296.  
951 <https://doi.org/10.1046/j.1365-2435.2001.00525.x>
- 952 Sorte, C. J., Jones, S. J., & Miller, L. P. (2011). Geographic variation in temperature tolerance as  
953 an indicator of potential population responses to climate change. *Journal of Experimental*  
954 *Marine Biology and Ecology*, 400(1), 209-217. <https://doi.org/10.1016/j.jembe.2011.02.009>
- 955 Sparks, M. M., Westley, P. A., Falke, J. A., & Quinn, T. P. (2017). Thermal adaptation and  
956 phenotypic plasticity in a warming world: Insights from common garden experiments on Alaskan  
957 sockeye salmon. *Global Change Biology*, 23(12), 5203–5217. <https://doi.org/10.1111/gcb.13782>

- 958 Stevens, G. (1989). The latitudinal gradient in geographical range: how so many species coexist  
959 in the tropics. *American Naturalist*, 133(2), 240-256. <https://doi.org/10.1086/284913>
- 960 Stillman, J. H. (2003). Acclimation capacity underlies susceptibility to climate change. *Science*,  
961 301(5629), 65–65. <https://doi.org/10.1126/science.1083073>
- 962 Stoks, R., Verheyen, J., Dievel, M., & Tüzün, N. (2017). Daily temperature variation and  
963 extreme high temperatures drive performance and biotic interactions in a warming world.  
964 *Current Opinion in Insect Science*, 23, 35–42. <https://doi.org/10.1016/j.cois.2017.06.008>
- 965 Sunday, J., Bates, A., & Dulvy, N. (2010). Global analysis of thermal tolerance and latitude in  
966 ectotherms. *Proceedings of the Royal Society B: Biological Sciences*, 278(1713), 1823–1830.  
967 <https://doi.org/10.1098/rspb.2010.1295>
- 968 Sydeman, W. J., Santora, J. A., Thompson, S., Marinovic, B., & Lorenzo, E. (2013). Increasing  
969 variance in North Pacific climate relates to unprecedented ecosystem variability off California.  
970 *Global Change Biology*, 19(6), 1662-1675. <https://doi.org/10.1111/gcb.12165>
- 971 Tallmon, D. A., Luikart, G., & Waples, R. S. (2004). The alluring simplicity and complex reality  
972 of genetic rescue. *Trends in Ecology & Evolution*, 19(9), 489–496.  
973 <https://doi.org/10.1016/j.tree.2004.07.003>
- 974 Tewksbury, J. J., Huey, R. B., & Deutsch, C. A. (2008). Putting the heat on tropical  
975 animals. *Science*, 320(5881), 1296-1297. <https://doi.org/10.1126/science.1159328>
- 976 Thibert-Plante, X., & Hendry, A. (2011). The consequences of phenotypic plasticity for  
977 ecological speciation. *Journal of Evolutionary Biology*, 24(2), 326–342.  
978 <https://doi.org/10.1111/j.1420-9101.2010.02169.x>

- 979 Thompson, J., Higgins, D., & Gibson, T. (1994). CLUSTAL W: improving the sensitivity of  
980 progressive multiple sequence alignment through sequence weighting. *Nucleic Acids Research*,  
981 22(22), 4673-4680. <https://doi.org/10.1093/nar/22.22.4673>
- 982 Torda, G., Donelson, J., Aranda, M., Barshis, D. J., Bay, L., Berumen, M. L., Bourne, D. G.,  
983 Cantin, N., Foret, S., Matz, M., Miller, D. J., Moya, A., Putnam, H. M., Ravasi, T., van Oppen,  
984 M. J. H., Vega Thurber, R., Vidal-Dupiol, J., Voolstra, C. R., Watson, S.-A., Whitelaw, E.,  
985 Willis, B. L., & Munday, P. L. (2017). Rapid adaptive responses to climate change in corals.  
986 *Nature Climate Change*, 7(9), 627-636. <https://doi.org/10.1038/nclimate3374>
- 987 Turner, J. (1981). Latitudinal patterns of calanoid and cyclopoid copepod diversity in estuarine  
988 waters of eastern North America. *Journal of Biogeography*, 8(5), 369.  
989 <https://www.jstor.org/stable/2844757>
- 990 Turner, J. (2004). The importance of small planktonic copepods and their roles in pelagic marine  
991 food webs. *Zoological Studies*, 43(2), 255-266.
- 992 Ummenhofer, C. C., & Meehl, G. A. (2017). Extreme weather and climate events with ecological  
993 relevance: a review. *Philosophical Transactions of the Royal Society B*, 372(1723), 20160135.  
994 <https://doi.org/10.1098/rstb.2016.0135>
- 995 Van de Waal, D. B., Verschoor, A. M., Verspagen, J. M., van Donk, E., & Huisman, J. (2010).  
996 Climate-driven changes in the ecological stoichiometry of aquatic ecosystems. *Frontiers in*  
997 *Ecology and the Environment*, 8(3), 145-152. <https://doi.org/10.1890/080178>
- 998 Vinagre, C., Leal, I., Mendonca, V., Madeira, D., Narciso, L., Diniz, M. S., & Flores, A. A.  
999 (2016). Vulnerability to climate warming and acclimation capacity of tropical and temperate

- 1000 coastal organisms. *Ecological indicators*, 62, 317-327.
- 1001 <https://doi.org/10.1016/j.ecolind.2015.11.010>
- 1002 Wernberg, T., Bennett, S., Babcock, R. C., de Bettignies, T., Cure, K., Depczynski, M., Dufois,  
1003 F., Fromont, J., Fulton, C. J., Hovey, R. K., Harvey, E. S., Holmes, T. H., Kendrick, G. A.,  
1004 Radford, B., Santana-Garcon, J., Saunders, B. J., Smale, D. A., Thomsen, M. S., Tuckett, C. A.,  
1005 Tuya, F., Vanderklift, M. A., & Wilson, S. (2016). Climate-driven regime shift of a temperate  
1006 marine ecosystem. *Science*, 353(6295), 169–172. <https://doi.org/10.1126/science.aad8745>
- 1007 West-Eberhard, M. J. (2005). Phenotypic accommodation: adaptive innovation due to  
1008 developmental plasticity. *Journal of Experimental Zoology. Part B, Molecular and*  
1009 *Developmental Evolution*, 304(6), 610–618. <https://doi.org/10.1002/jez.b.21071>
- 1010 West-Eberhard, M. J. (2003). Developmental plasticity and evolution. *Oxford Publishers*.
- 1011 Wijffels, S., Roemmich, D., Monselesan, D., Church, J., & Gilson, J. (2016). Ocean temperatures  
1012 chronicle the ongoing warming of Earth. *Nature Publishing Group*, 6(2), 116-118.  
1013 <https://doi.org/10.1038/nclimate2924>
- 1014 Williams, D. A., Brown, S. D., & Crawford, D. L. (2008). Contemporary and historical  
1015 influences on the genetic structure of the estuarine-dependent Gulf killifish *Fundulus*  
1016 *grandis*. *Marine Ecology Progress Series*, 373, 111-121. <https://doi.org/10.3354/meps07742>
- 1017 Yampolsky, L., Schaer, T., & Ebert, D. (2013). Adaptive phenotypic plasticity and local  
1018 adaptation for temperature tolerance in freshwater zooplankton. *Proceedings of the Royal Society*  
1019 *B: Biological Sciences*, 281(1776), 20132744. <https://doi.org/10.1098/rspb.2013.2744>
- 1020

1021 **Supplementary Table**

1022 Supp. Table 1: Temperature data used for predictions of vulnerability to warming. Current  
1023 temperature data was acquired from the MODIS-aqua SST database. Warming was estimated  
1024 from a high-resolution model of warming in the North Atlantic (Saba *et al.* 2016). Change in  
1025 survivorship at maximum temperatures was estimated using TPCs based on a developmental  
1026 temperature equal to the mean temperature.

| <b>Pop</b> | <b>Latitude</b> | <b>Current<br/>Mean<br/>Temp<br/>(°C)</b> | <b>Current<br/>Max<br/>Temp<br/>(°C)</b> | <b>Future<br/>Mean<br/>Temp<br/>(°C)</b> | <b>Future<br/>Max<br/>Temp<br/>(°C)</b> | <b>Estimated<br/>Temp<br/>Increase<br/>(°C)</b> | <b>Change in<br/>Survivorship</b> |
|------------|-----------------|-------------------------------------------|------------------------------------------|------------------------------------------|-----------------------------------------|-------------------------------------------------|-----------------------------------|
| KL         | 25.283891       | 25.1                                      | 29.56                                    | 26.6                                     | 31.06                                   | 1.5                                             | -0.0023                           |
| PR         | 26.483536       | 24.79                                     | 29.42                                    | 26.29                                    | 30.92                                   | 1.5                                             | -0.15                             |
| PG         | 26.940398       | 24.69                                     | 28.8                                     | 26.19                                    | 30.3                                    | 1.5                                             | -0.032                            |
| MR         | 27.505606       | 20.77                                     | 21.84                                    | 22.27                                    | 23.34                                   | 1.5                                             | -0.0049                           |
| SP         | 27.507322       | 24.02                                     | 29.5                                     | 25.52                                    | 31                                      | 1.5                                             | -0.16                             |
| NS         | 29.037478       | 22.84                                     | 26.71                                    | 24.34                                    | 28.21                                   | 1.5                                             | -0.011                            |
| CT         | 41.320591       | 12.52                                     | 18.69                                    | 14.52                                    | 20.69                                   | 2                                               | 0.065                             |
| ME         | 44.615086       | 9.05                                      | 11.87                                    | 12.55                                    | 15.37                                   | 3.5                                             | 0.098                             |
| SA         | 45.100059       | 9.37                                      | 13.06                                    | 12.87                                    | 16.56                                   | 3.5                                             | 3.50E-04                          |
| SB         | 46.27291        | 12.38                                     | 15.76                                    | 13.88                                    | 17.26                                   | 1.5                                             | 0.054                             |

1027

1028

1029

1030

1031

1032

1033 **Supplementary Figures**

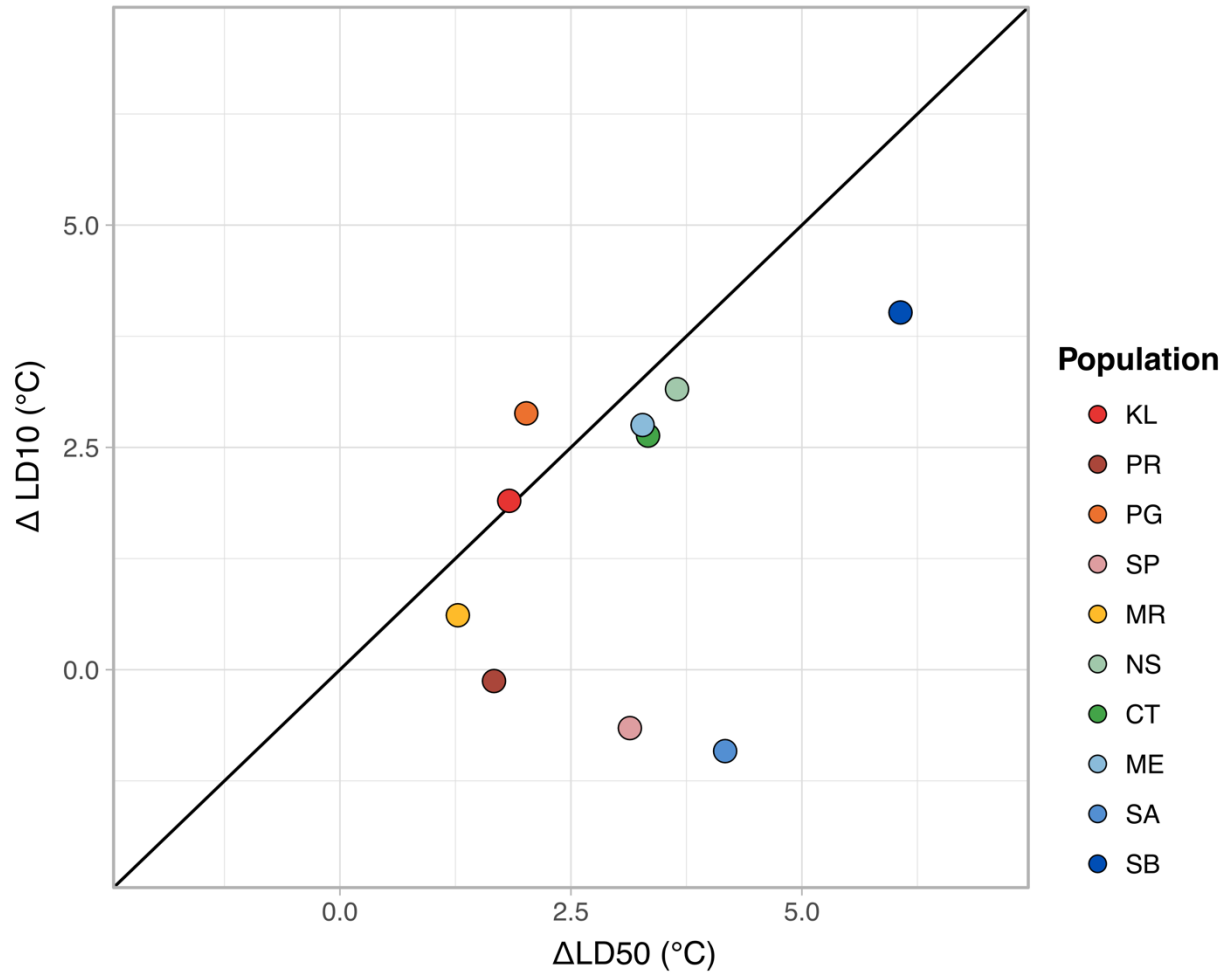

1034

1035 Supp. Fig. 1: Change in thermal limits vs. change in thermal tolerance by developmental  
1036 phenotypic plasticity. The solid line represents a 1:1 relationship. Points that fall below the line  
1037 represent a larger increase in thermal tolerance than thermal limits.



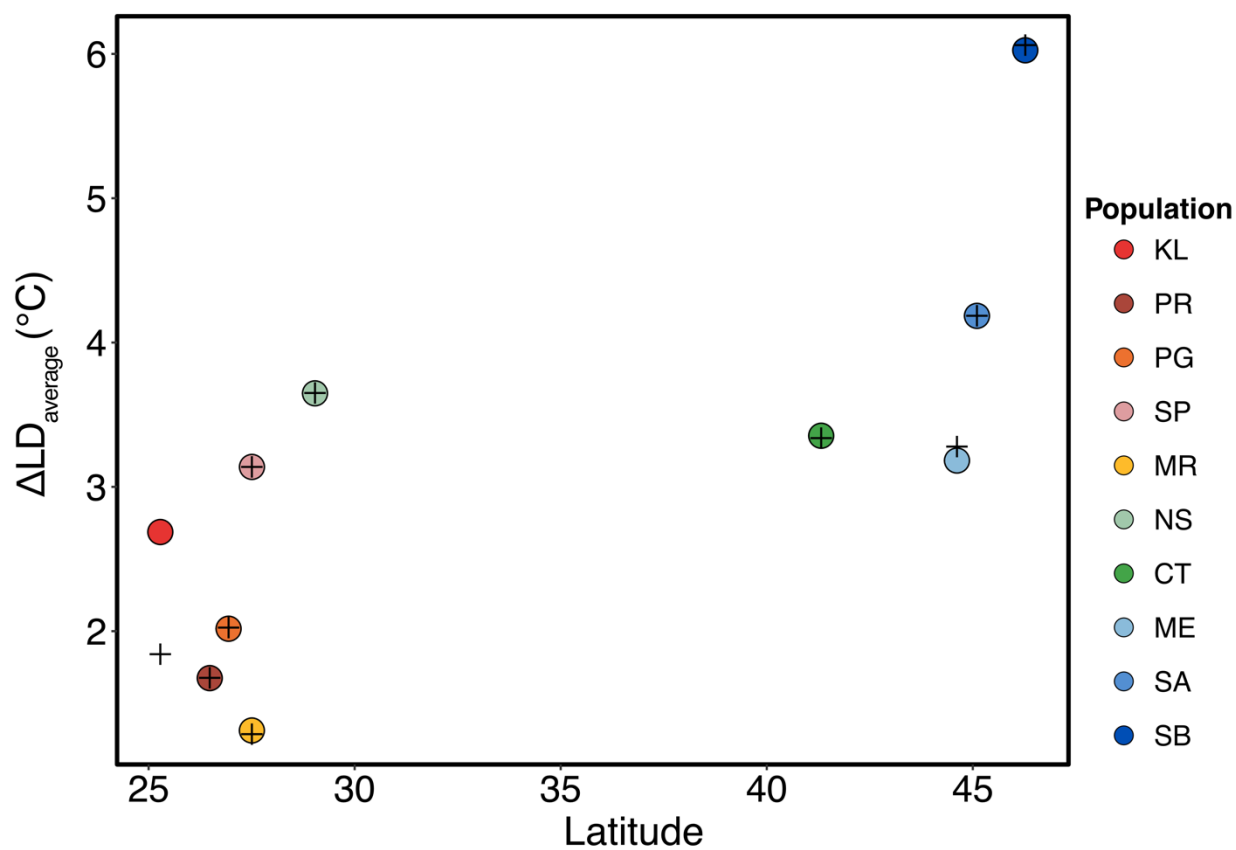

1038

1039 Supp. Fig. 2: Average increase in survivorship at every dosage level. No major differences are

1040 observed between this metric and  $\Delta LD_{50}$  values, which are represented by black crosses.

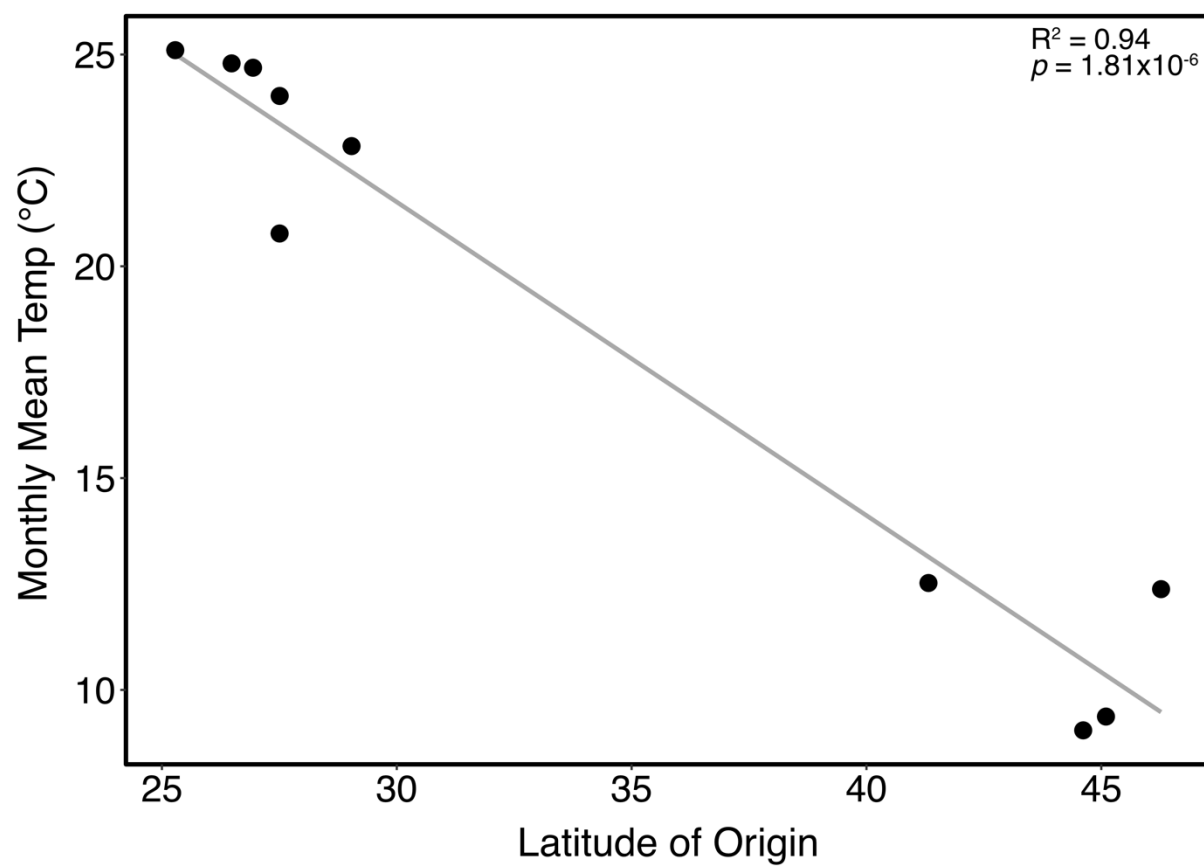

1041

1042 Supp. Fig. 3: Correlation between monthly mean temperature and latitude. A significant

1043 correlation is observed.

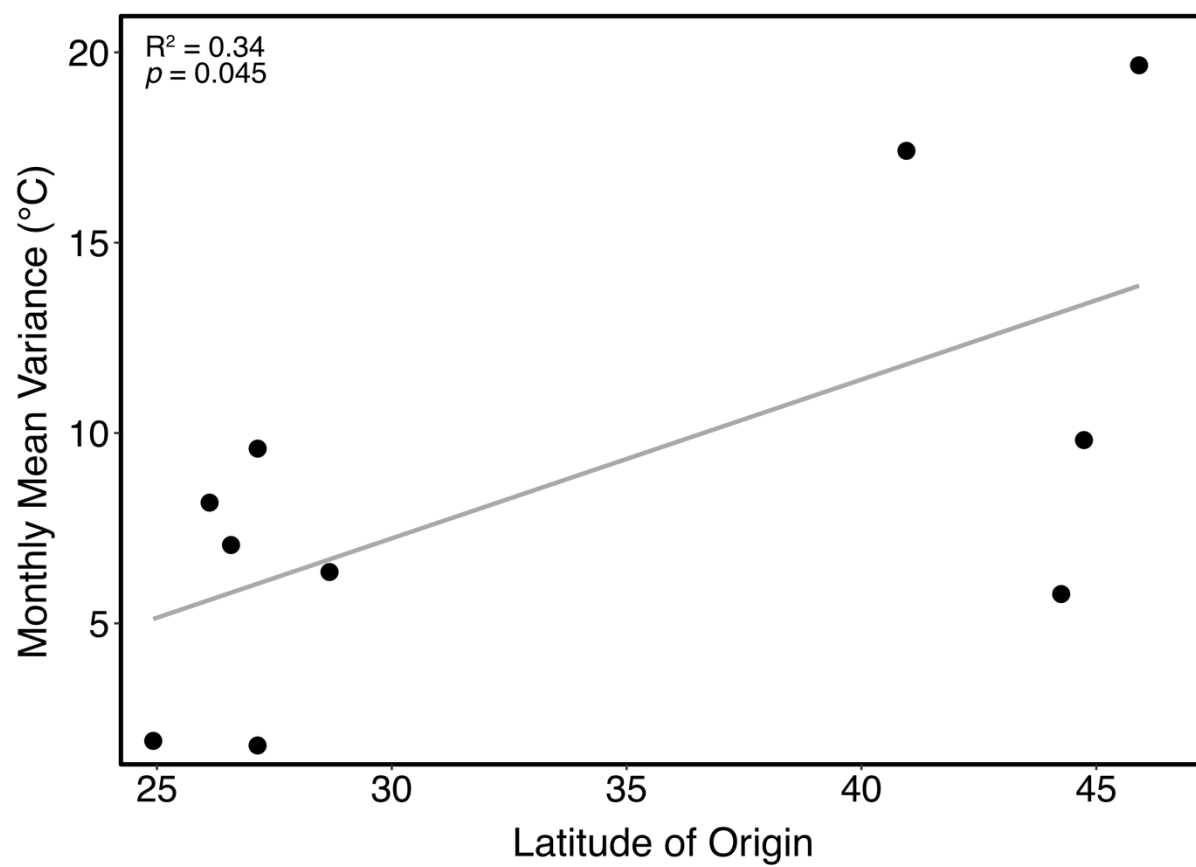

1044

1045 Supp. Fig. 4: Correlation between monthly mean temperature variance and latitude. A significant

1046 correlation is observed.

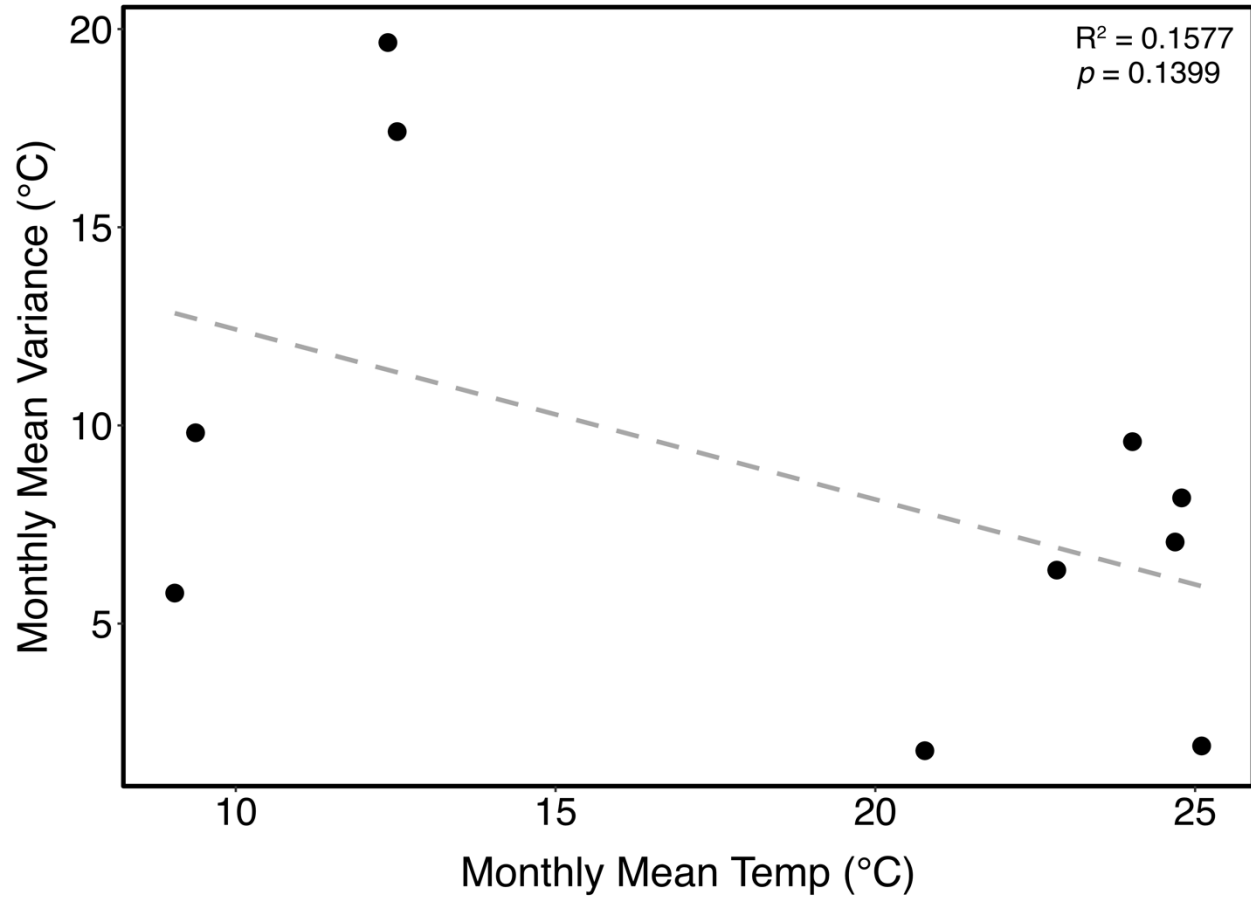

1047

1048 Supp. Fig. 5: Correlation between the two explanatory environmental variables (mean monthly  
1049 temperature and mean monthly temperature variance). No significant relationship between the  
1050 variables is observed.

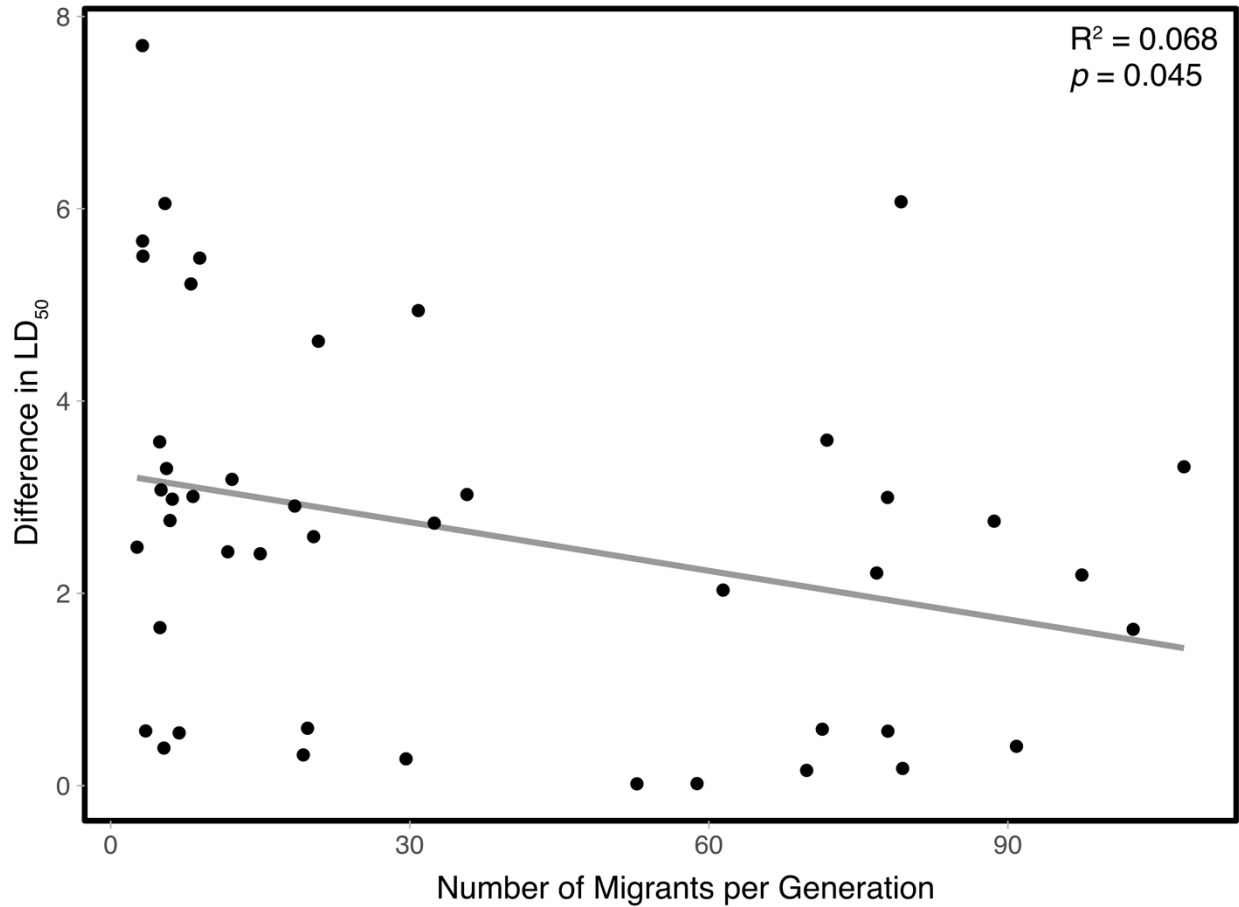

1051

1052 Supp. Fig. 6 – Correlation between the estimated number of migrants exchanged between two  
1053 populations and the corresponding pairwise difference in thermal tolerance values between those  
1054 populations.
